# Supplementary material for: Quest for certainty regarding early discharge in paediatric low-risk febrile neutropenia: a multicentre qualitative focus group discussion study involving patients, parents and healthcare professionals in the UK
Source: PubMed Central journal article supplement — BMJ Open. 2018 May 14;8(5):e020324. doi: 10.1136/bmjopen-2017-020324 (PMC5961608; doi:10.1136/bmjopen-2017-020324), 2018-05-14
Supplement: bmjopen-2017-020324.draft_revisions.pdf [file bmjopen-2017-020324.draft_revisions.pdf]

# BMJ Open

BMJ Open is committed to open peer review. As part of this commitment we make the peer review history of every article we publish publicly available.

When an article is published we post the peer reviewers' comments and the authors' responses online. We also post the versions of the paper that were used during peer review. These are the versions that the peer review comments apply to.

The versions of the paper that follow are the versions that were submitted during the peer review process. They are not the versions of record or the final published versions. They should not be cited or distributed as the published version of this manuscript.

BMJ Open is an open access journal and the full, final, typeset and author-corrected version of record of the manuscript is available on our site with no access controls, subscription charges or pay-per-view fees (<http://bmjopen.bmj.com>).

If you have any questions on BMJ Open's open peer review process please email [info.bmjopen@bmj.com](mailto:info.bmjopen@bmj.com)

# BMJ Open

## The quest for certainty regarding early discharge in paediatric low risk febrile neutropenia: a multi-centre focus group discussion study involving patients, parents and healthcare professionals

|                                 |                                                                                                                                                                                                                                                                    |
|---------------------------------|--------------------------------------------------------------------------------------------------------------------------------------------------------------------------------------------------------------------------------------------------------------------|
| Journal:                        | <i>BMJ Open</i>                                                                                                                                                                                                                                                    |
| Manuscript ID                   | bmjopen-2017-020324                                                                                                                                                                                                                                                |
| Article Type:                   | Research                                                                                                                                                                                                                                                           |
| Date Submitted by the Author:   | 30-Oct-2017                                                                                                                                                                                                                                                        |
| Complete List of Authors:       | Morgan, Jessica; University of York, Centre for Reviews and Dissemination<br>Phillips, Bob; University of York, CRD<br>Stewart, Lesley; University of York, Centre for Reviews and Dissemination<br>Atkin, Karl; University of York, Department of Health Sciences |
| <b>Primary Subject Heading</b>: | Paediatrics                                                                                                                                                                                                                                                        |
| Secondary Subject Heading:      | Qualitative research, Oncology                                                                                                                                                                                                                                     |
| Keywords:                       | febrile neutropenia, focus group, early discharge, certainty                                                                                                                                                                                                       |
|                                 |                                                                                                                                                                                                                                                                    |

SCHOLARONE™  
Manuscripts

1  
2  
3 **The quest for certainty regarding early discharge in paediatric low risk febrile neutropenia: a**  
4 **multi-centre focus group discussion study involving patients, parents and healthcare professionals**

5 Jessica E Morgan<sup>1</sup>, Bob Phillips<sup>1,2</sup>, Lesley A Stewart<sup>1</sup> and Karl Atkin<sup>3</sup>

7  
8 Corresponding Author: Jessica E Morgan, [jess.morgan@york.ac.uk](mailto:jess.morgan@york.ac.uk), Centre for Reviews and  
9 Dissemination, University of York, York, UK, YO10 5DD, Tel: +44 (0)1904 321082.

10  
11 Affiliations:

- 12 1. Centre for Reviews and Dissemination, University of York, York, UK.
- 13 2. Department of Paediatric Haematology and Oncology, Leeds Teaching Hospitals NHS Trust,  
14 Leeds, UK.
- 15 3. Department of Health Sciences, University of York, York, UK.

16  
17  
18 Article: 5222

19  
20 Abstract: 298 words

21  
22 Acknowledgements: Without doubt, the success of this study was made possible through the  
23 existence of a strong network of paediatric oncology and haematology services in the UK and more  
24 specifically through the availability of the regular febrile neutropenia audits performed by the  
25 Children's Cancer and Leukaemia Group.  
26  
27  
28  
29  
30  
31  
32  
33  
34  
35  
36  
37  
38  
39  
40  
41  
42  
43  
44  
45  
46  
47  
48  
49  
50  
51  
52  
53  
54  
55  
56  
57  
58  
59  
60

## **Abstract**

Objectives: A systematic review of paediatric low risk febrile neutropenia found that outpatient care is safe, with low rates of treatment failure. However, this review, and a subsequent meta-ethnography, suggested that early discharge of these patients may not be acceptable to key stakeholders. This study aimed to explore experiences and perceptions of patients, parents and healthcare professionals involved in paediatric febrile neutropenia care in the UK.

Setting: Three different centres within the UK, purposively selected from a national survey on the basis of differences in their service structure and febrile neutropenia management.

Participants: Thirty-two participants were included in eight focus group discussions.

Primary and secondary outcome measures: Experiences and perceptions of paediatric febrile neutropenia care

Results: Participants described a quest for certainty, in which they attempted to balance the uncertainty involved in understanding, expressing and negotiating risk with the illusion of certainty provided by strict protocols. Participants assessed risk using both formal and informal stratification tools, overlaid with emotional reactions to risk and experiences of risk within other situations. The benefits of certainty provided by protocols resulted in frustration at their strict constraints. The perceived benefits and harms of inpatient care that participants had previously experienced informed their appraisals of future treatment strategies. This work demonstrated how statistics identified in systematic reviews are used by key stakeholders to assess risk differently, and how families in particular can view the harms of therapeutic options as different from the outcomes utilised within the literature.

Conclusions: This study highlighted the previously underestimated harms of admission for febrile neutropenia and the paternalistic nature of decision making, along with the frustrations and challenges for all parties involved in febrile neutropenia care. It justifies a reassessment of current treatment strategies for these children and further exploration of the potential to introduce shared decision making.

1  
2  
3 Strengths and weaknesses of this study:

- 4
- 5 • This study involves new voices in the discussion of febrile neutropenia management, particularly healthcare professionals.
  - 6
  - 7 • It specifically explored disease-specific factors involved in decision making about early discharge.
  - 8
  - 9 • The inclusion of multiple centres allows for an understanding of service design and centre culture upon participants' perceptions.
  - 10
  - 11 • Challenges related to the groups which proved difficult to recruit, including young people and those who have a limited ability to communicate in English.
  - 12
  - 13 • The small size of some of the focus groups may be considered a limitation by some. The implications of this are discussed further in the text.
  - 14
  - 15
  - 16

17 Funding statement: Dr Jess Morgan was funded by Candlelighters Children's Cancer Charity for the duration of her PhD fellowship, of which this study forms a part. Candlelighters have had no influence on the conduct, findings or conclusions of this research.

18  
19  
20  
21 Competing interests statement: The authors have no competing interests to declare.

22 Authors' contributions: JEM designed the study, approached and liaised with centres, moderated focus groups, analysed the data and wrote the first draft of the manuscript. BP, LAS and KA provided substantial critical input into the design, performance and analysis of the study, throughout the work. They also critically revised the manuscript. All authors have given approval for the final version to be published.

23  
24  
25  
26  
27  
28  
29 Data Sharing Statement: Given the nature of qualitative research, no additional unpublished data is available from this study.

## Background

Febrile neutropenia is the commonest life-threatening complication of treatment for childhood cancer and carries a risk of sepsis, including intensive care admission and death.[1] However, over 50% of children have no significant sequelae, or clinically or microbiologically defined infection.[2, 3] Risk stratification tools may help distinguish those with high risk febrile neutropenia from those with lower risk of significant complications.[3] Current treatment for children with febrile neutropenia in the UK consists of admission to hospital for at least 48 hours, with administration of empirical intravenous antibiotics.[4]

It has been suggested that reducing therapy for children with low risk febrile neutropenia could improve quality of life, reduce hospital acquired infections and reduce costs to healthcare .[5–8] Our recent systematic review found that early discharge did not increase intensive care admissions or death, but did appear to increase the risk of readmission to hospital, from around 2.2% to 14%.[9] Furthermore, there was a suggestion that reduced therapy options may not be acceptable to families and professionals as consent rates to the included trials were relatively low. Investigating this further, a meta-ethnography of the existing qualitative literature surrounding early discharge revealed that there may be challenges surrounding practical logistics, and social or emotional issues, influenced by fear, timing and resources, when families make decisions about reduced therapy.[10] However, the existing data focused almost exclusively on parental views, lacked exploration of the influence of the healthcare settings on experiences, and had little disease-specific data about febrile neutropenia.

This study spoke to patients, parents and healthcare professionals involved in care of children and young people affected by low risk febrile neutropenia, to build understanding about perceptions of early discharge and so inform future policy and practice. We aimed to explore the contextual features that might influence the experience of individual patients and families, including previous experiences of febrile neutropenia; family structure and background; and healthcare service design and culture. This paper presents one of the key themes from the findings, with the remainder presented elsewhere, to enable richer explorations within the limits of article word counts.

## Methods

NHS Research Ethics Committee (ref 15/YH0208) and study sites' Research and Development approval was obtained prior to commencement of the research.

### *Study site identification and recruitment*

Data from a recent UK survey were used to identify centres with different approaches to risk stratification, low risk protocols, shared care services and geographical spread of patients.[11] Three centres were purposively selected to enable investigation of the role of various centre-level factors, and then approached through professional groups within the Children's Cancer and Leukaemia Group (CCLG).

Centres 1 and 2 both have around 25 inpatient beds at the Primary Treatment Centres (PTCs) and see 100-150 new cases of childhood cancer per year. Centre 1 has minimal care of febrile neutropenia in its shared care centres. Centre 2 has some shared care services but the majority of cases of febrile neutropenia are managed in the PTC. Centre 3 treats over 160 new children per year, and have more than 30 inpatient beds. They have a strong shared care network and most low risk febrile neutropenia is managed within Paediatric Oncology Shared Care Units (POSCUs).

Centres 1 and 3 closely followed the current National Institute for Health and Care Excellence (NICE) guidelines for febrile neutropenia.[12] Centre 2 used a higher threshold to define fever, and did not use a risk stratification tool, although they were in the process of reviewing their policy. All centres' protocols involved at least 48 hours admission with intravenous antibiotics for at least 24 hours.

The study opened to recruitment in July 2015 and the final focus group discussion took place in March 2016.

#### *Identification, recruitment and consent of participants*

Four focus group discussions were planned in each study site, for each of: patients (aged 13-18years), parents of teenagers (13-18years), parents of younger children (under 13years), and healthcare professionals (doctors and nurses working actively with children with low risk febrile neutropenia). Families were invited if they were considered to be at risk of low risk febrile neutropenia, or within 6 months of being at risk, assessed by the modified Alexander rule.[13] Patients receiving palliative care alone were excluded. Parent-child dyads were not explicitly recruited, but could be included. Similarly, both of a patient's parents could be included.

Families were identified and invited to participate by their local team. Healthcare professionals were invited through local team meetings and through emails sent by the site-specific collaborator. Written consent was obtained. Participants had the right to withdraw at any point up to two weeks following the focus group discussion. Participants received travel expenses and a £20 Amazon voucher for their attendance at the group.

#### *Focus group discussions*

Each group had between 3 and 7 participants and lasted between 45 and 86 minutes (median 73 minutes). JM moderated all groups, with an assistant present. Focus group topic guides are included in supplementary resource 1. Encrypted digital audio recordings of each discussion were obtained, then transcribed and anonymised by JM. A research journal was kept throughout.

#### *Analysis*

This study used a constant comparison approach. Each transcript was individually coded. At the intra-group comparison stage, individual voices were followed through the focus groups to identify codes which occurred more frequently, or with different quality, dependent upon the characteristics of individuals. Discussions were then compared to other groups of participants (healthcare professionals, parents of under 13s, parents of teenagers and young people) and other centres. At this inter-group stage, the triangulation of centres and participant groups was explicitly explored. The two stages were then overlaid to provide a network through which general themes were compared and mapped prior to representing the final framework.

## **Results**

#### *Participants*

In total, 32 participants were included in 8 focus group discussions. Four additional focus group discussions were desired but were precluded by poor recruitment of young people and parents of teenagers in centres 2 and 3. Table 1 provides a summary of the focus groups performed at each centre and Table 2 provides a more detailed summary of the focus group compositions.

#### *Understanding, expressing and negotiating risk*

In all centres, healthcare professionals struggled to cognitively separate different febrile neutropenia risk groups, tending to think about children as having “febrile neutropenia”, rather than low or high risk episodes.

*“4: I think it’s just I’ve been here for an awful long time and that’s what we’ve done and I know it’s the small number of children that you can remember that just ... that just do.. collapse within less than 8 hours...*

*Mod: without giving us patient identifiable data, could you describe one?*

*4: mm...oh God... erm... ermm... yeah probably the most vivid one was when I was over at [another hospital] ... so I couldn’t even tell you the name of the patient... erm... but walked onto the ward having had a single fever at home... and within... within minutes we were resuscitating him...*

*1: but he wouldn’t be low risk would he?*

*4: he wouldn’t no but that’s the bit that I don’t know why but that’s the bit that sticks in my mind...” (Centre 1, nurse (4) and doctor (1))*

It is not surprising that the healthcare professional participants had emotional responses to the idea of early discharge; generally anxiety or fear. One participant physically shivered at the mention of outpatient treatment:

*“1: it’s not like they won’t be febrile at home... they’d be going home febrile wouldn’t they (murmur of agreement) so then you’d have to work out what...*

*4: [4] shivered again!!! (laughter)” (Centre 1, doctor (1) and nurse (4))*

Parents and young people groups participants were unfamiliar with formal risk stratification. Instead, parents employed their own methods to establish the dangers posed by an episode of febrile neutropenia. Participants differentiated episodes into those where the child appeared unwell, was not their usual self, and caused the parents to worry, from those in which the child had a fever but their behaviour did not otherwise concern their parents. As such, the idea of being ‘well’ or ‘unwell’ formed an instinctive risk stratification ‘tool’. Families envisaged that the management of these groups would be adapted according to the severity of ‘unwellness’.

When formal risk stratification tools were introduced into the parents’ focus groups discussions, participants spoke about how clearly knowing whether their child was at low or high risk of significant complications, facilitated their own decision making about preferred care.

*“2: ...now that I know that you’ve said that he’s in a lower risk group then actually maybe I wouldn’t have panicked quite so much and thought you know... and if the option would have been there... I would have probably gone with it but not knowing that information and ... and just being told 38 degrees he’s got to go in and .... And I just follow protocol... I follow the rules...” (Centre 1, parents of under 13s)*



This acceptance by parents of risk stratification as a concept, and their current use of a similar assessment strategy, suggests that increased communication of the level of a child's risk may support shared decision making between families and healthcare professionals. Furthermore, explicitly stating the level of risk for a child may quieten the emotional responses that healthcare professionals have towards reduced therapy regimens.

The challenge of deciphering statistical evidence regarding risks was evident, even within the healthcare professionals groups. In one group, misunderstandings about systematic review methodology, and confusion over statistical issues, such as power, led to mistrust of the evidence.

*“Mod: ... 2660 episodes of data, how much more would people need to be more confident in this number (points to treatment failure rate)?*

*[ongoing discussion]*

*1: is that international?*

*Mod: yes it's international around the world*

*2: so if it's all round the world?*

*[additional discussion]*

*2: so actually you could say it's a small number if it's...*

*1: there's the whole world...*

*2: yeah couldn't you? and how many within each study? That would be the other thing*

*[further discussion]*

*1: because if the numbers were high, people would be more convinced that this is real, I think if er... you know I'd see, for instance this is just an example, if you had 500,000 episodes and then you saw this, you'd say yeah that's it, this is what we need to go for (murmur of agreement from (2)) but two and a half thousand odd is not going to be convincing.” (Centre 2, doctor (1) and nurse (2))*

Alongside this poor statistical literacy, in all healthcare professional groups, there were moments within the discussion where comments made were inconsistent with other beliefs they held. In Centre 2, one participant stated *“but if you look at the 0.1% risk [of PICU admission or death in low risk febrile neutropenia], it's still high, in that group, because your range is between 0.03 to 0.3%, and you've got 0.1%”*. Considering a 0.1% risk of PICU admission or death to be high seems unusual: in a field where 3% of children with cancer die of infection and around 15% die of progressive disease.[1, 14]

One method that healthcare professional participants used to help understand the risk statistics and express the inconsistency of their discussions was to compare the risks in febrile neutropenia to other clinical situations, both within the context of other haematology and oncology conditions and within other specialties, particularly general paediatrics.

Discussion by professionals about their own decision making revealed and acknowledged tension between making judgements based on research evidence and individual emotional experience.

1  
2  
3 *"2: I think the interesting thing there for me [Mod] is that you've presented us with the*  
4 *evidence (laughter from others) which is by far and away saying that this is a safe thing to*  
5 *do...*

6  
7 *4: we've chosen to ignore it...*

8  
9 *2: but we've chosen to ignore it... so we're practicing non-evidence based anecdotal*  
10 *medicine (ongoing laughter) but it's what we're comfortable with...*

11  
12 *Mod: ok... so what factors played the role in making that decision...*

13  
14 *2: non evidence based anecdotal...*

15  
16 *4: anxiety...*

17  
18 *(laughter and indiscernible mutterings)" (Centre 1, doctor (2) and nurse (4))*

19 In Centre 3, professionals used fewer anecdotal accounts of patient deteriorations and appeared to  
20 have a less emotional, and more positive, response to early discharge.

21  
22 Professional participants were very clear about the extent of influence that healthcare staff should  
23 have over families' perceptions of risk. In the following quote, a participant outlines the dilemma of  
24 how to communicate about risk.

25  
26 *"...and then you have to try and put the frighteners on them and you have to gauge that*  
27 *right as to how... because I've had people saying oh I... oh I know ... we've got four hours to*  
28 *wait... and I say well sometimes children deteriorate more rapidly than that....erm... but it's*  
29 *really difficult to know quite how... how scary to be with them isn't it?" (Centre 3, doctor)*

30  
31  
32  
33 Throughout this theme, it is clear that participants struggled with the uncertainty of risk. They  
34 sought the illusion of certainty, aiming to find security in the absolute, irrespective of the reality of  
35 its non-existence. This may be founded in limited understanding or familiarity with statistical  
36 concepts. However, the assessment of risk is not a purely technical act but instead a political and  
37 social construct, with many underlying social, emotional and cultural influences.

#### 38 39 *Articulating and interpreting protocols*

40  
41 All the documents discussed in this manuscript are entitled guidelines, suggesting flexibility in the  
42 use of their recommendations. However, participants used the word protocol almost exclusively and  
43 appeared to understand and use these documents as formal and rigid policies. We have used their  
44 terminology.

45  
46 Although the direction given by protocols provided reassurance to healthcare professionals,  
47 protocols were interpreted as controlling and limited decisions by implying an inability to deviate  
48 from them, resulting in frustration:

49  
50  
51 *"1: I think the other thing that makes it frustrating its very protocol driven innit?"*

52  
53 *(2: (at the same time) yeah)*

54  
55 *1: I think people stick rigidly to 48 hours as though it's a magic number and nobody can go*  
56 *home at 43 hours and etcetera...so I think it's very very rigid err which is done for good*

1  
2  
3 *reasons but I think if you dare to suggest that you veer from that you're scorned upon..."*

4 *(Centre 1, doctors)*  
5  
6

7 Professionals described risks of working outside the protocol, in particularly relating to receiving  
8 criticism from colleagues, with groups only briefly referring to the safety risks to patients of  
9 deviating from a protocol. Notably, they referred to the risks to patients of other professionals  
10 departing from the protocol but the risks of criticism refer to their own practice.  
11

12 Participants varied in how much flexibility they thought there should be within a protocol. Centre 1  
13 spoke of a strict protocol with minimal deviations and were willing to accept a greater degree of  
14 frustration because of this. Centre 2 gave considerable weight to clinical reviews, with minimal  
15 references to protocols as a guiding feature. Combining these approaches, professionals at centre 3  
16 spoke about the integration of protocol and clinical judgement:  
17

18 *"1: like you've got the protocol there but actually if you know your patient... me and the*  
19 *consultant might make a decision on our patient that isn't what the protocol says but*  
20 *we're happy with that clinical decision" (Centre 3, nurse)*  
21  
22  
23

24 Parents' main concern regarding protocols related to the fact that discharge rarely occurred at the  
25 point where it was theoretically possible in the protocol. Parents distinguished between appropriate  
26 delays due to the child's ill health, and those which they felt were in some way avoidable. They  
27 voiced their frustration about how services, and decision making, were conditional upon the timing  
28 of a child's presentation with low risk febrile neutropenia. The staff working out of hours may not be  
29 as senior or as experienced as those who provide routine services, and as such, parents recognised  
30 that they may make different judgements about the levels of risk involved or may not feel able to  
31 take on the responsibility of discharging a child.  
32  
33

34 Astutely, parents in a number of groups identified that blood culture results were a significant factor  
35 in professionals' decision making in regards to discharge and that most protocols demanded a  
36 negative blood culture result before a child could be evaluated for discharge. Delays in processing  
37 could result in substantial delays in decision-making.  
38

39 *"1: then my frustration comes with the process and blood culturing and that, towards the*  
40 *end of a stay, is what just really really narks me, that we actually spend at least an extra*  
41 *day in because they don't culture the bloods when you get in straight away, so if we were*  
42 *admitted on Monday at noon or after, they don't start culturing the bloods until Tuesday*  
43 *at 9am..." (Centre 3, parent of under 13s)*  
44  
45  
46  
47

48 Thus, blood cultures symbolise the potential for parents to 'escape' from hospital treatment for  
49 febrile neutropenia. Delays in obtaining results capture parents' greatest dislike of current services  
50 and protocols; unnecessarily prolonged hospital stays with an apparently well child.  
51

#### 52 *Preferences for care*

53

54 Participants' past experiences help to inform and find balance between the uncertainty of risks and  
55 the certainty of protocols and begin to demonstrate the need for discretion and the importance of  
56 individualised care for paediatric low risk febrile neutropenia.  
57

1  
2  
3 Parents spoke in all groups about difficulties during previous febrile neutropenia episodes.  
4 Participants discussed many issues similar to those found in the previous studies in the meta-  
5 ethnography.[10] Much of which focused on the disruptions and costs associated with hospital  
6 treatment, alongside social and emotional impact.  
7

8 Participants spoke of the tiring nature of travelling, particularly at night time or during the rush hour.  
9 Distance from the hospital played a key role in whether early discharge regimens would be accepted,  
10 with families living close to the treating hospital more likely to accept outpatient care. The degree of  
11 shared care impacted upon this issue. Participants in the centre where febrile neutropenia is treated  
12 in POSCUs, barely mentioned travelling, presumably because they already live close to their treating  
13 centres.  
14

15 Parents also discussed finances, related to travel, parking, hospital food and lost income. This was  
16 vividly described by some participants, including the loss of a self-run business, repossession of a car  
17 and the receipt of benefits such as free school meals. The unpredictable nature of febrile  
18 neutropenia episodes proved more problematic than scheduled attendances for review or  
19 chemotherapy as it did not allow them to plan other aspects of their lives, chiefly their work.  
20

21 Participants spoke about the psychological impact of previous admissions on their child who would  
22 become quiet, anxious or angry when their temperatures were checked at home and they  
23 anticipated they might need to travel to hospital. Following discharge, psychological effects would  
24 continue for some time:  
25

26  
27 *"1: we're definitely a more stressed family when he's admitted...definitely... and it takes a*  
28 *long time for the family to get back on track, it's not just he's home and we're all fine, you*  
29 *actually have to completely collapse and rebuild and that takes a couple of days... it's a*  
30 *really bizarre explanation but it's just like you are all on this adrenaline and what've we got*  
31 *to do to get by and where has everybody got to go and then you're all home and you go*  
32 *ahhh and then you start to... just try and get back that routine... it's not easy to get back*  
33 *that routine if there is a routine but... yeah... there is a psychological impact on it*  
34 *definitely..."(centre 3, parents of under 13s)*  
35  
36  
37  
38  
39

40 Parents also spoke about the impact on their families. They described split families, where one  
41 parent was in hospital with the affected child and the other at home with their siblings, with  
42 occasional 'handovers' of care, impacting on their relationships as couples. The parent who took on  
43 the role of primary carer during admissions often had a deeper relationship with the child when they  
44 returned home as well, and the other parent could feel rejected or 'worthless'. They expressed guilt  
45 over their choices when faced with the differing needs of their children.  
46  
47

48 Professionals mostly spoke about the experiences of families, with very few references to their own  
49 perspectives, even when directly asked. They mentioned each of the key issues mentioned above  
50 but provided less detail to the individual topics and did not identify more nuanced issues about the  
51 patient experience. This situation resulted in double silencing of both parents and professional  
52 voices.  
53

54 Six newly identified difficulties were discussed by participants in this study. First, all participants  
55 spoke clearly about how these are generally well children who are active, noisy and boisterous on a  
56  
57

ward. They reported boredom and frustration during low risk febrile neutropenia and were concerned about their child disturbing other children who were more unwell.

Secondly, parents worried about 'hospital acquired infection' and spoke about the risks of wards or hospitals which were not clean.

Third, participants spoke about the impact of 'source isolation' in two ways. First, well-children who are source isolated are usually even more bored or frustrated. Second, where source isolation beds are limited, staff can feel that these are unavailable to sicker patients when children with low risk febrile neutropenia are admitted. Parents were also aware of this, expressing guilt for using these resources.

Staff expanded on the issue of bed pressure (the fourth new difficulty), describing intense challenges faced by health services, where numbers of bed spaces are reduced and costs of bed occupancy are high.

The fifth challenge, discussed only by parents and young people, related to side effects of treatments, particularly diarrhoea caused by antibiotics, necessitating source isolation, and might also cause the child to need intravenous fluids or total parenteral nutrition, delaying their discharge. Parents voiced a clear preference for reduced amounts of antibiotics, particularly those given intravenously. In addition, parents spoke about concerns regarding antibiotic resistance and how this might impact on their child in the future. These issues were not raised in the healthcare professional discussions.

Sixth, healthcare professionals in Centre 3 discussed the long-term psychological impact of current febrile neutropenic care.

*"... as a late effects nurse... the risk of repeated hospitalisations and family seeing their child as sick and continuing to do so after the... and never really recovering from that sick child mentality... I don't know if that's a bit strong... I see the late effect of that when you've still got families who haven't been able to stop treating their child as a sick child right up until the child being in their early adulthood... I don't know how you'd ever measure that to balance it against that 0.1% risk..." (Centre 3, nurse)*

Three benefits of inpatient care were described. First – and the most pervasive - was the idea that hospital is a safe place, where professionals looked after their child's health, though focused mainly on the physical aspects of this. Parents clearly stated that hospital was the place they would prefer their child to be if they judged them unwell. Families felt comforted by the presence of healthcare staff with whom they had good relationships and by the ritual of performing regular observations, although some groups did highlight that many observations could be done at home.

Second; hospital can be fun. This was primarily brought up in the groups for young people and their parents, who enjoyed the input of youth support co-ordinators and activities that are organised in the hospital. This did not seem to play a major role in decision making and parents were clear that they would still prefer a reduced therapy strategy.

Third is the relational benefits that children and young people gained from the undivided attention of a parent, who, at home, might be distracted by other siblings and by the 'hubhub' of daily life.

1  
2  
3 When participants discussed the preferences of other participant groups, they often misunderstood  
4 perceived desires of others. For example, the young people anticipated that their parents would all  
5 rather receive inpatient care. This was at odds to the parents' stated preferences  
6

7 *"1: if my mum agreed with the doctors, then I'd just do what she said, cos they don't like...  
8 when I'm saying something its normally cos it's what I'd prefer, when my mum tells me to  
9 do something its what's best for me... so... I'd probably whinge about having to staying in  
10 hospital but then... I'd just stay anyway.*

11  
12  
13 *2: I don't know... I don't think I'd really... I think my mum would just do what's right for me.  
14 Yeah" (Centre 3, Young people)*  
15

## 16 17 18 Discussion

19 Participants described a *quest for certainty*, in which they attempted to balance the uncertainty  
20 involved in understanding, expressing and negotiating risk with the illusion of certainty provided by  
21 strict protocols. Risks were assessed using both formal and informal stratification tools, overlaid with  
22 the emotional reactions to risk and experiences of risk within other situations. Understanding  
23 statistical expressions of risk proved challenging for patients, parents and healthcare professionals.  
24 Meanwhile, the benefits of certainty provided by protocols resulted in frustration at the strict  
25 constraints they mandated. The perceived benefits and harms of inpatient care that participants had  
26 previously experienced informed their appraisals of future treatment strategies and provided them  
27 with both more confidence in their risk assessments and a greater desire for flexibility within  
28 protocols.  
29  
30

31 Throughout this study, the differences in focus between families and healthcare professionals  
32 became apparent. First, participants had different focuses concerning health. Healthcare  
33 professionals had a limited focus on physical health, almost entirely on the prevention of an  
34 intensive care admission or death of a child. Their focus on individual children was relatively narrow,  
35 though they had a broader focus on the number of families impacted, taking into account the variety  
36 within their service population. Parents meanwhile focused on the broader aspects of child health,  
37 including side effects of interventions, social and emotional impacts and wider family health.  
38 However, they mostly concentrated on their individual child. Though they did discuss how others  
39 might differ in their opinions and desires when considering future services, it was the optimum  
40 regimen for their child and family that was put forward most strongly. These differences in priorities  
41 and objectives for future care are understandable given the responsibilities of families and  
42 healthcare professionals. Stakeholders did not always understand each other's priorities.  
43  
44

45 Linked to this difference in focus on health, participants discussed different negative consequences  
46 of care. Participants used 'horror stories' to illustrate the most distressing aspects of being involved  
47 with children with febrile neutropenia. 'Horror stories' are a method which participants employ to  
48 demonstrate key points, forming an important part of their narrative reconstruction and assuming  
49 symbolic meaning relative to their beliefs and priorities.[15] The 'horror stories' told by healthcare  
50 professionals within this study almost always discussed intensive care admission or death as their  
51 primary adverse experiences. Meanwhile, parents focused more upon their experiences of poor  
52 care, such as delayed identification of positive culture growth, difficult venous access and the failure  
53 of professionals to identify what they perceived to be an unwell child. This highlights the differences  
54 in consideration of health between the two groups, whilst emphasising that many parents have no  
55  
56  
57

1  
2  
3 experience of death or intensive care admissions related to febrile neutropenia. Thus their  
4 perceptions of risk of these events were somewhat different to those of professionals who often  
5 have experience of high risk febrile neutropenia. To families who experience more of the burdens of  
6 inpatient febrile neutropenia care, it is the failures to provide care focused on a holistic definition of  
7 health which play a more significant role in their experience.  
8

9 These differences in focus further inform the interpretation of the findings of our previous  
10 systematic review.[9] This review used outcomes that reflect the focus of healthcare professionals –  
11 intensive care, death and healthcare service usage, as opposed to those of the families receiving  
12 care – outcomes which were collected by the primary studies. These studies were designed by  
13 professionals to detect these outcomes, and failed to take into account the experiences of care that  
14 families value, meaning these outcomes are also hidden in secondary research. Future study design  
15 should involve more public and patient involvement in the outcome setting stage, and the  
16 interpretation of quantitative research should involve discussions with patients and families so as to  
17 gain more insight into the different viewpoints on specific statistical findings, dependent on prior  
18 experiences and consideration of other benefits and harms.  
19  
20

21 Historically, determinism has shaped healthcare culture.[16] In the deterministic worldview,  
22 predominant in early medicine, the role of physicians was to establish the definitive causes and  
23 treatments for disease. The clinician would strive to control each aspect of a patient's health so as to  
24 have control over their outcomes.[16] Determinism inspires and promotes the creation of certainty,  
25 and thus where this cannot be achieved, the illusion of certainty can be considered a reasonable  
26 replacement as it provides a sense of control and reassurance within difficult situations.  
27 Understanding statistical risks and making decisions based upon them is not prioritised, instead:  
28 *"The goal is certainty, rather than learning how to live with uncertainty"*. [16]  
29  
30

31 In contemporary healthcare, there is no certainty. Shared decision making has been suggested as an  
32 appropriate step in overcoming determinism, recognising differences in focus and beginning to  
33 respect the rights of patients to have autonomy over their healthcare decisions. It has been  
34 suggested that shared decision making is most suited to particular situations in which there is no  
35 clear evidence of the most appropriate course of action, and where the patient's values or  
36 preferences might play a more important role in resolving this equipoise.[17–20] In low risk  
37 paediatric febrile neutropenia, this could now be considered to be the case for the decision about  
38 timing of discharge from hospital. Evidence suggests that serious safety events are not affected by  
39 the location of care and as such individualised judgements about other risks of readmission and  
40 patient preferences become more prominent.[9] Specifically, there has been a drive to use shared  
41 decision making *"where the balance of risks and benefits varies widely in different medical, social  
42 and health care situations"*. [17] Given the findings reported here, it might be considered that  
43 patients' social circumstances, along with the individual psychological impact of admission, might  
44 lead to a different balance of risks and benefits for each family.  
45  
46

#### 47 *Strengths and weaknesses*

48

49 This study involves new voices in the discussion of febrile neutropenia management, particularly  
50 healthcare professional and deepened consideration of the disease-specific factors relating to febrile  
51 neutropenia which influence stakeholders' experiences and inform their decisions about future care.  
52

53 The inclusion of multiple centres allows for an understanding of the impact of service design and  
54 centre culture upon participants' perceptions.  
55  
56  
57

1  
2  
3 The majority of the challenges relate to the groups which proved difficult to recruit, including young  
4 people and those who have a limited ability to communicate in English. This reflects broader  
5 problems within the research community of engaging with participants from social disadvantaged  
6 groups and those from multi-cultural contexts.[15, 21] Introducing Amazon vouchers to compensate  
7 participants for their time resulted in improvements in recruitment of young people and thus have  
8 helped to reduce the shortcomings. Future studies may wish to integrate other methodologies,  
9 including interviews or online focus groups for those who do not wish to participate in face-to-face  
10 groups.  
11

12 The small size of some of the focus groups may be considered a limitation by some as they may lead  
13 to less extensive discussions and shy or dominating participants may have a more acute effect on the  
14 group. However, smaller groups have been purported to be beneficial in discussions involving  
15 complex subjects, or in groups of experts, such as healthcare professionals, and thus we feel are not  
16 a substantial disadvantage in this setting.[21–23]  
17

### 18 **Conclusions**

19  
20 This study highlights the previously underestimated harms of admission for febrile neutropenia and  
21 the paternalistic nature of decision making, along with the frustrations and challenges for all parties  
22 involved in febrile neutropenia care. It justifies a reassessment of current treatment strategies for  
23 these children and further exploration of the potential to introduce shared decision making.  
24  
25

### 26 **References**

- 27  
28  
29 1. Basu SK, Fernandez ID, Fisher SG, et al (2005) Length of Stay and Mortality Associated With  
30 Febrile Neutropenia Among Children With Cancer. *J Clin Oncol* 23:7958–7966. doi:  
31 10.1200/JCO.2005.01.6378  
32
- 33 2. Chisholm JC, Dommett R (2006) The evolution towards ambulatory and day-case management  
34 of febrile neutropenia. *Br J Haematol* 135:3–16. doi: 10.1111/j.1365-2141.2006.06253.x  
35
- 36 3. Phillips RS, Lehrnbecher T, Alexander S, Sung L (2012) Updated systematic review and meta-  
37 analysis of the performance of risk prediction rules in children and young people with febrile  
38 neutropenia. *PLoS One* 7:e38300. doi: 10.1371/journal.pone.0038300  
39
- 40 4. Johnson E, Phillips RS, Chisholm J, et al (2015) CCLG National Febrile Neutropenia Audit Report  
41 2015.  
42
- 43 5. Ammann RA, Bodmer N, Hirt A, et al (2010) Predicting Adverse Events in Children With Fever  
44 and Chemotherapy-Induced Neutropenia: The Prospective Multicenter SPOG 2003 FN Study. *J*  
45 *Clin Oncol* 28:2008–2014. doi: 10.1200/JCO.2009.25.8988  
46
- 47 6. Sung L, Aplenc R, Alonzo TA, et al (2013) Effectiveness of supportive care measures to reduce  
48 infections in pediatric AML: a report from the Children's Oncology Group. *Blood* 121:3573–  
49 3577. doi: 10.1182/blood-2013-01-476614  
50
- 51 7. Mustafa MM, Aquino VM, Pappo A, et al (1996) A pilot study of outpatient management of  
52 febrile neutropenic children with cancer at low risk of bacteremia. *J Pediatr* 128:847–9.  
53  
54  
55  
56  
57



- 1
- 2
- 3 8. Teuffel O, Amir E, Alibhai SMH, et al (2011) Cost-effectiveness of outpatient management for febrile neutropenia in children with cancer. *Pediatrics* 127:e279-286. doi: 10.1542/peds.2010-0734
- 4
- 5
- 6
- 7 9. Morgan JE, Cleminson J, Atkin K, et al (2016) Systematic review of reduced therapy regimens for children with low risk febrile neutropenia. *Support Care Cancer Off J Multinatl Assoc Support Care Cancer*. doi: 10.1007/s00520-016-3074-9
- 8
- 9
- 10
- 11 10. Morgan J, Cleminson J, Atkin K Qualitative synthesis of experiences of early discharge, with a focus on paediatric febrile neutropenia. *Submiss.*
- 12
- 13
- 14 11. Bate J, Gibson F, Selwood K, et al (2013) A reaudit of current febrile neutropenia practice in UK paediatric oncology centres prior to implementation of NICE guidance. *Arch Dis Child* 98:315–316. doi: 10.1136/archdischild-2013-303810
- 15
- 16
- 17
- 18 12. NICE CG151 Neutropenic sepsis: full guideline. In: NICE. <http://www.nice.org.uk/>. Accessed 25 Sep 2013
- 19
- 20
- 21 13. Dommert R, Geary J, Freeman S, et al (2009) Successful introduction and audit of a step-down oral antibiotic strategy for low risk paediatric febrile neutropenia in a UK, multicentre, shared care setting. *Eur J Cancer* 45:2843–9. doi: 10.1016/j.ejca.2009.06.003
- 22
- 23
- 24
- 25 14. National Cancer Intelligence Network (2012) National Registry of Childhood Tumours Progress Report. NRCT, Oxford, UK
- 26
- 27
- 28 15. Barbour R (2007) *Doing Focus Groups*. SAGE Publications, Ltd, London
- 29
- 30 16. Gigerenzer G, Gaissmaier W, Kurz-Mileke E, et al (2008) Helping Doctors and Patients Make Sense of Health Statistics. *Psychol Sci Public Interest* 8:53–96.
- 31
- 32
- 33 17. Ferrer RL, Gill JM (2013) Shared Decision Making, Contextualized. *Ann Fam Med* 11:303–305. doi: 10.1370/afm.1551
- 34
- 35
- 36 18. Berger Z (2015) Navigating the Unknown: Shared Decision-Making in the Face of Uncertainty. *J Gen Intern Med* 30:675–678. doi: 10.1007/s11606-014-3074-8
- 37
- 38
- 39 19. Pollard S, Bansback N, Bryan S (2015) Physician attitudes toward shared decision making: A systematic review. *Patient Educ Couns* 98:1046–1057. doi: 10.1016/j.pec.2015.05.004
- 40
- 41
- 42 20. Elwyn G (2006) Idealistic, impractical, impossible? Shared decision making in the real world. *Br J Gen Pract* 56:403–404.
- 43
- 44
- 45 21. Bloor M, Frankland J, Thomas M, Robson K (2001) *Focus groups in Social Research*.
- 46
- 47 22. Morgan DL (1997) *Focus Groups as Qualitative Research*, 2nd ed. Sage Publications, Inc, London
- 48
- 49
- 50 23. Barbour RS, Kitzinger J (1999) *Developing Focus Group Research: Politics, Theory and Practice*. SAGE Publications, Ltd, London
- 51
- 52
- 53
- 54
- 55
- 56
- 57
- 58
- 59
- 60

**Table 1 - Summary of focus group discussions performed by centre**

|                 | <b>Healthcare Professionals</b> | <b>Parents of patients aged under 13 years</b> | <b>Parents of patients aged over 13 years</b> | <b>Young People aged 13-18 years</b> |
|-----------------|---------------------------------|------------------------------------------------|-----------------------------------------------|--------------------------------------|
| <b>Centre 1</b> | Green                           | Green                                          | Green                                         | Green                                |
| <b>Centre 2</b> | Green                           | Green                                          | Red                                           | Red                                  |
| <b>Centre 3</b> | Green                           | Green                                          | Red                                           | Red                                  |

Key: Green – focus group performed, Red – focus group desired but precluded by poor recruitment

**Table 2- Table of focus group composition**

| Location | Group                | Number of participants | M:F ratio | Age         | Ethnicity (self-defined) | Composition notes                                                                                                                                                                                                                                                                                                                                                                                                                                            |
|----------|----------------------|------------------------|-----------|-------------|--------------------------|--------------------------------------------------------------------------------------------------------------------------------------------------------------------------------------------------------------------------------------------------------------------------------------------------------------------------------------------------------------------------------------------------------------------------------------------------------------|
| Centre 1 | Young people         | 3                      | 0:3       | 15-16 years | 3 White British          | 2 participants with Hodgkin's disease, one with ALL. One participant with no febrile neutropenia episodes, one with one low risk episode, one with 6 high risk episodes. All episodes treated at PTC (two episodes started at POSCU but transferred to PTC). No ICU admissions. One course of chemo delayed following high risk episode. Admissions 2-10 days (most 5-6 days).                                                                               |
| Centre 1 | Parents of Under 13s | 3                      | 0:3       | 36-43 years | 3 White British          | All nuclear families with two children. 2 degree level education, one GCSE level. All employed. Partners same educational and employment. Two own house, one rents privately. Affected children aged 4-10 years. Two ALL, one medulloblastoma. Between 2-10 episodes of FN; 0-8 high risk episodes each, 1-2 low risk episodes each. All managed at PTC. No ICU. One removal of line. One delayed course of chemo. Admissions 2 - 19 days (most 48-72 hours) |

**Table 2 - Table of focus group composition**

|          |                          |   |     |             |                            |                                                                                                                                                                                                                                                                                                                                                                                                                                                                                                                                                                                                                                                                                                                                                                                                                                                                                           |
|----------|--------------------------|---|-----|-------------|----------------------------|-------------------------------------------------------------------------------------------------------------------------------------------------------------------------------------------------------------------------------------------------------------------------------------------------------------------------------------------------------------------------------------------------------------------------------------------------------------------------------------------------------------------------------------------------------------------------------------------------------------------------------------------------------------------------------------------------------------------------------------------------------------------------------------------------------------------------------------------------------------------------------------------|
| Centre 1 | Parents of Over 13s      | 5 | 2:3 | 41-53 years | All White British          | <p>3 nuclear families with 2-3 children. One blended family (both parents present), with three children. One degree level education, one A Level, one ONC, two GCSE level. All employed except one who is semi-retired (to care for child). Partners same educational and employment levels. All own house, four with mortgage. Four have children who participated in young people's group.</p> <p>Affected children 13-16 years old. 2 with Hodgkin's disease, one with ALL, one with relapsed ALL. One patient with no febrile neutropenia episodes, one with one low risk episode, one with 6 high risk episodes, one with 7 high risk episodes and one low risk episode. All episodes treated at PTC (two episodes started at POSCU but transferred to PTC). No ICU admissions. Two courses of chemo delayed following high risk episodes. Admissions 2-10 days (most 5-6 days).</p> |
| Centre 1 | Healthcare Professionals | 7 | 3:4 | 30-51 years | 6 White British, 1 Chinese | 3 medical (SHO, registrar and consultant), 4 nursing (bands 5-7). 1-13 years at current grade. 1-24 years at current centre.                                                                                                                                                                                                                                                                                                                                                                                                                                                                                                                                                                                                                                                                                                                                                              |

1  
2  
3  
4  
5  
6  
7  
8  
9  
10  
11  
12  
13  
14  
15  
16  
17  
18  
19  
20  
21  
22  
23  
24  
25  
26  
27  
28  
29  
30  
31  
32  
33  
34  
35  
36  
37  
38  
39  
40  
41  
42  
43  
44  
45  
46  
47

**Table 2 - Table of focus group composition**

|          |                          |   |     |             |                                                  |                                                                                                                                                                                                                                                                                                                                                                                                                                                                                                                                                                                                                                                                                                       |
|----------|--------------------------|---|-----|-------------|--------------------------------------------------|-------------------------------------------------------------------------------------------------------------------------------------------------------------------------------------------------------------------------------------------------------------------------------------------------------------------------------------------------------------------------------------------------------------------------------------------------------------------------------------------------------------------------------------------------------------------------------------------------------------------------------------------------------------------------------------------------------|
| Centre 2 | Parents of Under 13s     | 5 | 1:4 | 35-44 years | All White British                                | <p>All nuclear families with 2-7 children. Two participants from same family. Three with degree level education, two with O levels. One employed, four homemakers/carers. Partners – one degree level education, one A levels, one HNC, two with O levels. 2 employed, one self-employed, two homemakers/carers. Three own house (two with mortgage), two rent privately.</p> <p>Affected children 2-9 years old. Diseases relapsed Wilm’s tumour, ALL, osteosarcoma, ependymoma. 2-7 episodes of febrile neutropenia; 1-5 high risk episodes each, 0-2 low risk episodes each. All but one managed in PTC. No ICU admissions. One course of chemo delayed. Admissions 2-14 days (median 4 days).</p> |
| Centre 2 | Healthcare Professionals | 3 | 0:3 | 43-60 years | 1 White British, 1 Indian (British), 1 Pakistani | 2 medical (registrar, consultant), 1 nursing. 7 months - 20 years at current grade. 7 months - 28 years at current centre.                                                                                                                                                                                                                                                                                                                                                                                                                                                                                                                                                                            |

**Table 2 - Table of focus group composition**

|          |                          |   |     |             |                   |                                                                                                                                                                                                                                                                                                                                                                                                                                                                                                                                                                                      |
|----------|--------------------------|---|-----|-------------|-------------------|--------------------------------------------------------------------------------------------------------------------------------------------------------------------------------------------------------------------------------------------------------------------------------------------------------------------------------------------------------------------------------------------------------------------------------------------------------------------------------------------------------------------------------------------------------------------------------------|
| Centre 3 | Parents of Under 13s     | 3 | 0:3 | 36-45 years | All White British | 2 nuclear families with two children. One blended family with 7 children. One A level education, 2 O level. All employed. Partners same educational and employment levels. Two own house (with mortgage), one rents from Local Authority.<br><br>Affected children 4-8 years old. All with ALL. 4-9 episodes of febrile neutropenia; 1-8 high risk episodes each, 0-3 low risk episodes each. All in POSCU (one later transferred to PTC). One admission to PICU after high risk episode. 3 delayed courses of chemo after high risk episodes. Admissions 2-14 days (most 48-72hrs). |
| Centre 3 | Healthcare Professionals | 3 | 0:3 | 30-55 years | All White British | 1 medical, 2 nursing (band 7). 3-12 years at current grade. 5-12 years at current centre.                                                                                                                                                                                                                                                                                                                                                                                                                                                                                            |

1  
2  
3  
4  
5  
6  
7  
8  
9  
10  
11  
12  
13  
14  
15  
16  
17  
18  
19  
20  
21  
22  
23  
24  
25  
26  
27  
28  
29  
30  
31  
32  
33  
34  
35  
36  
37  
38  
39  
40  
41  
42  
43  
44  
45  
46  
47  
48  
49  
50  
51  
52  
53  
54  
55  
56  
57  
58  
59  
60

For peer review only

## Focus group topic guides

### ***Summary Topic Guide for Focus Group Discussions with young people and parent participants***

All focus groups will begin with a reminder of the aims of the study, verbal confirmation of consent, the restating of the right to withdraw from the study up to two weeks following the focus group discussion and the opportunity for participants to ask any outstanding questions.

#### Introductory questions

1. What do you understand about febrile neutropenia?
  - Do you know anything about how to decide if someone has low risk or high risk febrile neutropenia?
2. Have you ever had an episode of febrile neutropenia? Can you tell me about it/them?
  - What is the treatment like in your hospital?
  - What were the best things about the episode of treatment? What were the worst? Why?

Explanation of current research and different possible treatment strategies.

3. What do you think about these different options? If they were all offered at your hospital, which would you pick and why?

It would be good to talk more about outpatient treatment of febrile neutropenia.

4. Tell me more about what you think of this option. Would you want it for you/your child?
5. Can you tell me a bit about how you decided if you would or wouldn't? What factors played a part in your decision making? How important was each factor?
  - If not mentioned, ask about: practical issues (eg transport, distance from hospital, finances, care of other children), emotional/social issues (eg. wanting to be together as a family, fear of going home, feeling of not being able to cope at home), trust in health care professionals
6. How would what your family/child feel influence your decision? What do you think they would say about outpatient care? If disagreements occurred, how should these be negotiated?
7. How would what your doctor/nurse feel influence your decision? What do you think they would say about outpatient care? If disagreements occurred, how should these be negotiated?

Introduce evidence about failure to consent rates.

8. Why do you think this might be?
9. Do you want to say more about the questions we just discussed in the light of this research?

#### Service design

10. How do you think an outpatient febrile neutropenia service could be designed to make you most happy with it?



- 1  
2  
3                   • If not mentioned discuss: when go home, route of antibiotics, how followed up  
4                   (home/clinic), what symptoms would be tolerated at home (eg repeated fever)  
5 Any other issues/questions/comments?  
6

7  
8 **All medical queries raised by the participants during the focus group discussions will be redirected**  
9 **to their clinical care team. Debriefing will be offered to participants immediately after the focus**  
10 **group discussions and a telephone number will also be provided in case they wish to discuss any**  
11 **further issues with the research.**  
12  
13

14  
15  
16  
17  
18  
19  
20  
21  
22  
23  
24  
25  
26  
27  
28  
29  
30  
31  
32  
33  
34  
35  
36  
37  
38  
39  
40  
41  
42  
43  
44  
45  
46  
47  
48  
49  
50  
51  
52  
53  
54  
55  
56  
57  
58  
59  
60

For peer review only

### **Summary Topic Guide for Focus Group Discussions with health care professionals**

All focus groups will begin with a reminder of the aims of the study, verbal confirmation of consent, the restating of the right to withdraw from the study up to two weeks following the focus group discussion and the opportunity for participants to ask any outstanding questions. Participants in the focus groups for healthcare professionals will be reminded that the research team are only interested in their general views and will not be discussing the details of individual cases.

#### Introductory questions

1. What is your role in looking after children with low risk febrile neutropenia?
2. Tell me about the treatment of low risk febrile neutropenia in your hospital?
3. What sort of issues develop when caring for patients with low risk febrile neutropenia?

Explanation of current research and different possible treatment strategies.

4. What do you think about these different options? Which one(s) do you think it is appropriate to offer to your patients?

It would be good to talk more about outpatient treatment of febrile neutropenia.

5. Tell me more about what you think of this option. Would you want it for your patients?
6. Can you tell me a bit about how you decided if you would or wouldn't? What factors played a part in your decision making? How important was each factor?
  - If not mentioned, ask about: practical issues (eg transport, distance from hospital, finances, care of other children), emotional/social issues (eg. wanting to be together as a family, fear of going home, feeling of not being able to cope at home), trust in health care professionals
7. How would what the family/child feel influence your decision? What do you think they would say about outpatient care? If disagreements occurred, how should these be negotiated?

Introduce evidence about failure to consent rates.

8. Why do you think this might be?
9. Do you want to say more about the questions we just discussed in the light of this research?

#### Service design

10. How do you think an outpatient febrile neutropenia service could be designed to make you most happy with it?
  - If not mentioned discuss: when go home, route of antibiotics, how followed up (home/clinic), what symptoms would be tolerated at home (eg repeated fever)
11. How does the design of the healthcare service as a whole influence how services could be delivered?
12. Who makes decisions about these kinds of changes? What do you think they would think/say?

Any other issues/questions/comments?

1  
2  
3  
4  
5  
6  
7  
8  
9  
10  
11  
12  
13  
14  
15  
16  
17  
18  
19  
20  
21  
22  
23  
24  
25  
26  
27  
28  
29  
30  
31  
32  
33  
34  
35  
36  
37  
38  
39  
40  
41  
42  
43  
44  
45  
46  
47  
48  
49  
50  
51  
52  
53  
54  
55  
56  
57  
58  
59  
60

**Debriefing will be offered to participants immediately after the focus group discussions and a telephone number will also be provided in case they wish to discuss any further issues with the research.**

For peer review only

# BMJ Open

**The quest for certainty regarding early discharge in  
paediatric low risk febrile neutropenia: a multi-centre  
qualitative focus group discussion study involving patients,  
parents and healthcare professionals in the UK**

|                                    |                                                                                                                                                                                                                                                                                                                                                              |
|------------------------------------|--------------------------------------------------------------------------------------------------------------------------------------------------------------------------------------------------------------------------------------------------------------------------------------------------------------------------------------------------------------|
| Journal:                           | <i>BMJ Open</i>                                                                                                                                                                                                                                                                                                                                              |
| Manuscript ID                      | bmjopen-2017-020324.R1                                                                                                                                                                                                                                                                                                                                       |
| Article Type:                      | Research                                                                                                                                                                                                                                                                                                                                                     |
| Date Submitted by the Author:      | 02-Feb-2018                                                                                                                                                                                                                                                                                                                                                  |
| Complete List of Authors:          | Morgan, Jessica; University of York, Centre for Reviews and Dissemination<br>Phillips, Bob; University of York, CRD; Leeds Teaching Hospitals NHS Trust,<br>Department of Paediatric Haematology and Oncology<br>Stewart, Lesley; University of York, Centre for Reviews and Dissemination<br>Atkin, Karl; University of York, Department of Health Sciences |
| <b>Primary Subject<br>Heading</b>: | Paediatrics                                                                                                                                                                                                                                                                                                                                                  |
| Secondary Subject Heading:         | Qualitative research, Oncology                                                                                                                                                                                                                                                                                                                               |
| Keywords:                          | febrile neutropenia, focus group, early discharge, certainty                                                                                                                                                                                                                                                                                                 |
|                                    |                                                                                                                                                                                                                                                                                                                                                              |

SCHOLARONE™  
Manuscripts

1  
2  
3 **The quest for certainty regarding early discharge in paediatric low risk febrile neutropenia: a**  
4 **multi-centre qualitative focus group discussion study involving patients, parents and healthcare**  
5 **professionals in the UK**  
6

7 Jessica E Morgan<sup>1</sup>, Bob Phillips<sup>1,2</sup>, Lesley A Stewart<sup>1</sup> and Karl Atkin<sup>3</sup>  
8

9 Corresponding Author: Jessica E Morgan, [jess.morgan@york.ac.uk](mailto:jess.morgan@york.ac.uk), Centre for Reviews and  
10 Dissemination, University of York, York, UK, YO10 5DD, Tel: +44 (0)1904 321082.  
11

12 Affiliations:

- 13 1. Centre for Reviews and Dissemination, University of York, York, UK.  
14 2. Department of Paediatric Haematology and Oncology, Leeds Teaching Hospitals NHS Trust,  
15 Leeds, UK.  
16 3. Department of Health Sciences, University of York, York, UK.  
17  
18  
19

20 Article: 5240

21 Abstract: 293 words  
22

23 Acknowledgements: Without doubt, the success of this study was made possible through the  
24 existence of a strong network of paediatric oncology and haematology services in the UK and more  
25 specifically through the availability of the regular febrile neutropenia audits performed by the  
26 Children's Cancer and Leukaemia Group. We thank all study participants for their honesty and  
27 engagement.  
28  
29  
30  
31  
32  
33  
34  
35  
36  
37  
38  
39  
40  
41  
42  
43  
44  
45  
46  
47  
48  
49  
50  
51  
52  
53  
54  
55  
56  
57  
58  
59  
60

## **Abstract**

Objectives: A systematic review of paediatric low risk febrile neutropenia found that outpatient care is safe, with low rates of treatment failure. However, this review, and a subsequent meta-ethnography, suggested that early discharge of these patients may not be acceptable to key stakeholders. This study aimed to explore experiences and perceptions of patients, parents and healthcare professionals involved in paediatric febrile neutropenia care in the UK.

Setting: Three different centres within the UK, purposively selected from a national survey on the basis of differences in their service structure and febrile neutropenia management.

Participants: Thirty-two participants were included in eight focus group discussions.

Primary outcomes: Experiences and perceptions of paediatric febrile neutropenia care, including possible future reductions in therapy

Results: Participants described a quest for certainty, in which they attempted to balance the uncertainty involved in understanding, expressing and negotiating risk with the illusion of certainty provided by strict protocols. Participants assessed risk using both formal and informal stratification tools, overlaid with emotional reactions to risk and experiences of risk within other situations. The benefits of certainty provided by protocols was counterbalanced by frustration at their strict constraints. The perceived benefits and harms of previous inpatient care informed participants' appraisals of future treatment strategies.

Conclusions: This study highlighted the previously underestimated harms of admission for febrile neutropenia and the paternalistic nature of decision making, along with the frustrations and challenges for all parties involved in febrile neutropenia care. It demonstrates how the same statistics, generated by systematic reviews, can be used by key stakeholders to interpret risk differently, and how families in particular can view the harms of therapeutic options as different from the outcomes utilised within the literature. It justifies a reassessment of current treatment strategies for these children and further exploration of the potential to introduce shared decision making.

1  
2  
3 Strengths and weaknesses of this study:

- 4
- 5 • This study involves new voices in the discussion of febrile neutropenia management, particularly healthcare professionals.
  - 6
  - 7 • It specifically explored disease-specific factors involved in decision making about early discharge.
  - 8
  - 9 • The inclusion of multiple centres allows for an understanding of service design and centre culture upon participants' perceptions.
  - 10
  - 11 • Challenges related to the groups which proved difficult to recruit, including young people and those who have a limited ability to communicate in English.
  - 12
  - 13 • The small size of some of the focus groups may be considered a limitation by some. The implications of this are discussed further in the text.
  - 14
  - 15
  - 16

17 Funding statement: Dr Jess Morgan was funded by Candlelighters Children's Cancer Charity for the duration of her PhD fellowship, of which this study forms a part. Candlelighters have had no influence on the conduct, findings or conclusions of this research.

18  
19  
20  
21 Competing interests statement: The authors have no competing interests to declare.

22 Authors' contributions: JEM designed the study, approached and liaised with centres, moderated focus groups, analysed the data and wrote the first draft of the manuscript. BP, LAS and KA provided substantial critical input into the design, performance and analysis of the study, throughout the work. They also critically revised the manuscript. All authors have given approval for the final version to be published.

23  
24  
25  
26  
27  
28  
29 Data Sharing Statement: Given the nature of qualitative research, no additional unpublished data is available from this study.

## Background

Febrile neutropenia is the commonest life-threatening complication of treatment for childhood cancer and carries a risk of sepsis, including intensive care admission and death.[1] However, over 50% of children have no significant sequelae, or clinically or microbiologically defined infection.[2, 3] Risk stratification tools may help distinguish those with high risk febrile neutropenia from those with lower risk of significant complications, though it should be recognised that these tools have some challenges and a universally agreed “gold standard” tool has yet to be defined.[3] Current treatment for children with febrile neutropenia in the UK consists of admission to hospital for at least 48 hours, with administration of empirical intravenous antibiotics.[4]

It has been suggested that reducing therapy for children with low risk febrile neutropenia could improve quality of life, reduce hospital acquired infections and reduce costs to healthcare.[5–8] Our recent systematic review found that early discharge did not increase intensive care admissions or death, but did appear to increase the risk of readmission to hospital, from around 2.2% to 14%.[9] Furthermore, there was a suggestion that reduced therapy options may not be acceptable to families and professionals as consent rates to the included trials were relatively low. Few other studies have explored family and professional preferences for location of therapy. In one study, interviews using a threshold technique found that just 53% of parents and 71% of professionals would choose outpatient treatment for low risk paediatric febrile neutropenia.[10] A meta-ethnography of the existing qualitative literature surrounding early discharge revealed that there may be challenges surrounding practical logistics, and social or emotional issues, influenced by fear, timing and resources.[11] However, the data focused almost exclusively on parental views, lacked exploration of the influence of healthcare settings, and had little disease-specific data about febrile neutropenia.

This study spoke to patients, parents and healthcare professionals involved in paediatric low risk febrile neutropenia, to build understanding about perceptions of early discharge and so inform future policy and practice. We aimed to explore the contextual features that might influence the experience of individual patients and families, including previous experiences of febrile neutropenia; family structure and background; and healthcare service design and culture. This paper presents one of the key themes from the findings, with the remainder presented elsewhere, to enable richer explorations within the limits of article word counts.

## Methods

NHS Research Ethics Committee (ref 15/YH0208) and study sites’ Research and Development approval was obtained prior to commencement of the research.

### *Study site identification and recruitment*

Data from a recent UK survey were used to identify centres with different approaches to risk stratification, low risk protocols, shared care services and geographical spread of patients.[12] Three centres were purposively selected to enable investigation of the role of various centre-level factors, and then approached through professional groups within the Children’s Cancer and Leukaemia Group (CCLG).

Centres 1 and 2 both have around 25 inpatient beds at the Primary Treatment Centres (PTCs) and see 100-150 new cases of childhood cancer per year. Centre 1 has minimal care of febrile neutropenia in its shared care centres. Centre 2 has some shared care services but the majority of cases of febrile neutropenia are managed in the PTC. Centre 3 treats over 160 new children per year,



1  
2  
3 and have more than 30 inpatient beds. They have a strong shared care network and most low risk  
4 febrile neutropenia is managed within Paediatric Oncology Shared Care Units (POSCUs).

5  
6 Centres 1 and 3 closely followed the current National Institute for Health and Care Excellence (NICE)  
7 guidelines for febrile neutropenia.[13] Centre 2 used a higher threshold to define fever, and did not  
8 use a risk stratification tool, although they were reviewing their policy. All centres' protocols  
9 involved at least 48 hours admission with intravenous antibiotics for at least 24 hours.

10  
11 The study opened to recruitment in July 2015 and the final focus group discussion took place in  
12 March 2016.

### 13 *Identification, recruitment and consent of participants*

14  
15 Four focus group discussions were planned in each study site, for each of: patients (aged 13-18  
16 years), parents of teenagers (13-18years), parents of younger children (under 13years), and  
17 healthcare professionals (doctors and nurses working in paediatric haematology and oncology  
18 services). Families were invited if they were at risk of low risk febrile neutropenia, or within 6  
19 months of being at risk, assessed by the modified Alexander rule.[14] This rule was chosen as it is the  
20 risk stratification tool advised by the UK's NICE guidelines.[13] Patients receiving palliative care alone  
21 were excluded. Parent-child dyads and parent couples were not explicitly recruited, but could be  
22 included.  
23

24  
25 Families were identified and invited to participate by their local team, then contacted by JM to  
26 establish a relationship and answer further research questions. Healthcare professionals were  
27 invited through local team meetings and emails sent by the site-specific collaborator. Written  
28 consent was obtained. Participants had the right to withdraw at any point up to two weeks following  
29 the focus group discussion. Participants received travel expenses and a £20 Amazon voucher for  
30 their attendance at the group. This reflects INVOLVE guidance for participant remuneration.[15]  
31

### 32 *Focus group discussions*

33  
34 Each group had between 3 and 7 participants and lasted between 45 and 86 minutes (median 73  
35 minutes). Focus groups were performed at a site suitable for participants, for most this was within  
36 the hospital building, but other facilities such as local library meeting rooms were also used. JM, a  
37 Clinical Research Fellow, moderated all groups, with an assistant present. This study forms part of  
38 her PhD and she has completed Level 7 training in focus group moderation and qualitative  
39 methodology. Participants were aware of the study's aims and objectives, and of JM's research  
40 background. If directly asked, she confirmed her medical professional background. . Focus group  
41 topic guides are included in supplementary resource 1. Encrypted digital audio recordings of each  
42 discussion were obtained, then transcribed and anonymised by JM. A research journal was kept  
43 throughout.  
44  
45

### 46 *Analysis*

47  
48 This study used a constant comparison approach. Each transcript was individually coded by JM with  
49 input from KA. No analytical software was used. At the intra-group comparison stage, individual  
50 voices were followed through the focus groups to identify codes which occurred more frequently, or  
51 with different quality, dependent upon the characteristics of individuals. Discussions were then  
52 compared to other groups of participants (healthcare professionals, parents of under 13s, parents of  
53 teenagers and young people) and other centres. At this inter-group stage, the triangulation of  
54 centres and participant groups was explicitly explored. The two stages were then overlaid to provide  
55 a network through which the general iterative themes were compared and mapped prior to  
56  
57

representing the final framework. Following presentations of the findings, participants have confirmed that they agree with the analytical findings.

## Results

### Participants

32 participants were included in 8 focus group discussions. Four additional focus group discussions were intended but were precluded by poor recruitment of young people and parents of teenagers in centres 2 and 3. Table 1 provides a summary of the focus groups performed at each centre and Table 2 provides a more detailed summary of the focus group compositions.

**Table 1 - Summary of focus group discussions performed by centre**

|          | Healthcare Professionals | Parents of patients aged under 13 years | Parents of patients aged over 13 years | Young People aged 13-18 years |
|----------|--------------------------|-----------------------------------------|----------------------------------------|-------------------------------|
| Centre 1 |                          |                                         |                                        |                               |
| Centre 2 |                          |                                         |                                        |                               |
| Centre 3 |                          |                                         |                                        |                               |

Key: Green – focus group performed, Red – focus group desired but precluded by poor recruitment

### Understanding, expressing and negotiating risk

In all centres, healthcare professionals struggled to cognitively separate different febrile neutropenia risk groups, tending to think about children as having “febrile neutropenia”, rather than low or high risk episodes.

*“4: I think it’s just I’ve been here for an awful long time and that’s what we’ve done and I know it’s the small number of children that you can remember that just ... that just do..*

*collapse within less than 8 hours...*

*Mod: without giving us patient identifiable data, could you describe one?*

*4: mm...oh God... erm... ermm... yeah probably the most vivid one was when I was over at [another hospital] ... so I couldn’t even tell you the name of the patient... erm... but walked onto the ward having had a single fever at home... and within... within minutes we were resuscitating him...*

*1: but he wouldn’t be low risk would he?*

*4: he wouldn’t no but that’s the bit that I don’t know why but that’s the bit that sticks in my mind...” (Centre 1, nurse (4) and doctor (1))*

It is not surprising that the healthcare professional participants had emotional responses to the idea of early discharge; generally anxiety or fear. One participant physically shivered at the mention of outpatient treatment:

1  
2  
3  
4  
5  
6  
7  
8  
9  
10  
11  
12  
13  
14  
15  
16  
17  
18  
19  
20  
21  
22  
23  
24  
25  
26  
27  
28  
29  
30  
31  
32  
33  
34  
35  
36  
37  
38  
39  
40  
41  
42  
43  
44  
45  
46  
47

**Table 2- Table of focus group composition**

| Location | Group                | Number of participants | M:F ratio | Age         | Ethnicity (self-defined) | Composition notes                                                                                                                                                                                                                                                                                                                                                                                                                                                   |
|----------|----------------------|------------------------|-----------|-------------|--------------------------|---------------------------------------------------------------------------------------------------------------------------------------------------------------------------------------------------------------------------------------------------------------------------------------------------------------------------------------------------------------------------------------------------------------------------------------------------------------------|
| Centre 1 | Young people         | 3                      | 0:3       | 15-16 years | 3 White British          | 2 participants with Hodgkin’s disease, one with ALL. One participant with no febrile neutropenia episodes, one with one low risk episode, one with 6 high risk episodes. All episodes treated at PTC (two episodes started at POSCU but transferred to PTC). No ICU admissions. One course of chemo delayed following high risk episode. Admissions 2-10 days (most 5-6 days).                                                                                      |
| Centre 1 | Parents of Under 13s | 3                      | 0:3       | 36-43 years | 3 White British          | All nuclear families with two children. 2 degree level education, one GCSE level. All employed. Partners same educational and employment. Two own house, one rents privately.<br><br>Affected children aged 4-10 years. Two ALL, one medulloblastoma. Between 2-10 episodes of FN; 0-8 high risk episodes each, 1-2 low risk episodes each. All managed at PTC. No ICU. One removal of line. One delayed course of chemo. Admissions 2 - 19 days (most 48-72 hours) |

**Table 2 - Table of focus group composition**

|          |                          |   |     |             |                            |                                                                                                                                                                                                                                                                                                                                                                                                                                                                                                                                                                                                                                                                                                                                                                                                                                                                                           |
|----------|--------------------------|---|-----|-------------|----------------------------|-------------------------------------------------------------------------------------------------------------------------------------------------------------------------------------------------------------------------------------------------------------------------------------------------------------------------------------------------------------------------------------------------------------------------------------------------------------------------------------------------------------------------------------------------------------------------------------------------------------------------------------------------------------------------------------------------------------------------------------------------------------------------------------------------------------------------------------------------------------------------------------------|
| Centre 1 | Parents of Over 13s      | 5 | 2:3 | 41-53 years | All White British          | <p>3 nuclear families with 2-3 children. One blended family (both parents present), with three children. One degree level education, one A Level, one ONC, two GCSE level. All employed except one who is semi-retired (to care for child). Partners same educational and employment levels. All own house, four with mortgage. Four have children who participated in young people's group.</p> <p>Affected children 13-16 years old. 2 with Hodgkin's disease, one with ALL, one with relapsed ALL. One patient with no febrile neutropenia episodes, one with one low risk episode, one with 6 high risk episodes, one with 7 high risk episodes and one low risk episode. All episodes treated at PTC (two episodes started at POSCU but transferred to PTC). No ICU admissions. Two courses of chemo delayed following high risk episodes. Admissions 2-10 days (most 5-6 days).</p> |
| Centre 1 | Healthcare Professionals | 7 | 3:4 | 30-51 years | 6 White British, 1 Chinese | 3 medical (SHO, registrar and consultant), 4 nursing (bands 5-7). 1-13 years at current grade. 1-24 years at current centre.                                                                                                                                                                                                                                                                                                                                                                                                                                                                                                                                                                                                                                                                                                                                                              |

1  
2  
3  
4  
5  
6  
7  
8  
9  
10  
11  
12  
13  
14  
15  
16  
17  
18  
19  
20  
21  
22  
23  
24  
25  
26  
27  
28  
29  
30  
31  
32  
33  
34  
35  
36  
37  
38  
39  
40  
41  
42  
43  
44  
45  
46  
47

**Table 2 - Table of focus group composition**

|          |                          |   |     |             |                                                  |                                                                                                                                                                                                                                                                                                                                                                                                                                                                                                                                                                                                                                                                                                       |
|----------|--------------------------|---|-----|-------------|--------------------------------------------------|-------------------------------------------------------------------------------------------------------------------------------------------------------------------------------------------------------------------------------------------------------------------------------------------------------------------------------------------------------------------------------------------------------------------------------------------------------------------------------------------------------------------------------------------------------------------------------------------------------------------------------------------------------------------------------------------------------|
| Centre 2 | Parents of Under 13s     | 5 | 1:4 | 35-44 years | All White British                                | <p>All nuclear families with 2-7 children. Two participants from same family. Three with degree level education, two with O levels. One employed, four homemakers/carers. Partners – one degree level education, one A levels, one HNC, two with O levels. 2 employed, one self-employed, two homemakers/carers. Three own house (two with mortgage), two rent privately.</p> <p>Affected children 2-9 years old. Diseases relapsed Wilm’s tumour, ALL, osteosarcoma, ependymoma. 2-7 episodes of febrile neutropenia; 1-5 high risk episodes each, 0-2 low risk episodes each. All but one managed in PTC. No ICU admissions. One course of chemo delayed. Admissions 2-14 days (median 4 days).</p> |
| Centre 2 | Healthcare Professionals | 3 | 0:3 | 43-60 years | 1 White British, 1 Indian (British), 1 Pakistani | 2 medical (registrar, consultant), 1 nursing. 7 months - 20 years at current grade. 7 months - 28 years at current centre.                                                                                                                                                                                                                                                                                                                                                                                                                                                                                                                                                                            |

**Table 2 - Table of focus group composition**

|          |                          |   |     |             |                   |                                                                                                                                                                                                                                                                                                                                                                                                                                                                                                                                                                                      |
|----------|--------------------------|---|-----|-------------|-------------------|--------------------------------------------------------------------------------------------------------------------------------------------------------------------------------------------------------------------------------------------------------------------------------------------------------------------------------------------------------------------------------------------------------------------------------------------------------------------------------------------------------------------------------------------------------------------------------------|
| Centre 3 | Parents of Under 13s     | 3 | 0:3 | 36-45 years | All White British | 2 nuclear families with two children. One blended family with 7 children. One A level education, 2 O level. All employed. Partners same educational and employment levels. Two own house (with mortgage), one rents from Local Authority.<br><br>Affected children 4-8 years old. All with ALL. 4-9 episodes of febrile neutropenia; 1-8 high risk episodes each, 0-3 low risk episodes each. All in POSCU (one later transferred to PTC). One admission to PICU after high risk episode. 3 delayed courses of chemo after high risk episodes. Admissions 2-14 days (most 48-72hrs). |
| Centre 3 | Healthcare Professionals | 3 | 0:3 | 30-55 years | All White British | 1 medical, 2 nursing (band 7). 3-12 years at current grade. 5-12 years at current centre.                                                                                                                                                                                                                                                                                                                                                                                                                                                                                            |

1  
2  
3  
4  
5 *"1: it's not like they won't be febrile at home... they'd be going home febrile wouldn't they*  
6 *(murmur of agreement) so then you'd have to work out what...*

7 *4: [4] shivered again!!! (laughter)" (Centre 1, doctor (1) and nurse (4))*  
8

9 Parents and young people groups participants were unfamiliar with formal risk stratification.  
10 Instead, parents employed their own methods to establish the dangers posed by an episode of  
11 febrile neutropenia. Participants differentiated episodes into those where the child appeared  
12 unwell, was not their usual self, and caused the parents to worry, from those in which the child had  
13 a fever but their behaviour did not otherwise concern their parents. As such, the idea of being 'well'  
14 or 'unwell' formed an instinctive risk stratification 'tool'. Families envisaged that the management of  
15 these groups would be adapted according to the severity of 'unwellness'.  
16

17  
18 When formal risk stratification tools were introduced into the parents' focus groups discussions,  
19 participants spoke about how clearly knowing whether their child was at low or high risk of  
20 significant complications, facilitated their own decision making about preferred care.  
21

22 *"2: ...now that I know that you've said that he's in a lower risk group then actually maybe I*  
23 *wouldn't have panicked quite so much and thought you know... and if the option would*  
24 *have been there... I would have probably gone with it but not knowing that information*  
25 *and ... and just being told 38 degrees he's got to go in and .... And I just follow protocol... I*  
26 *follow the rules..." (Centre 1, parents of under 13s)*  
27  
28

29 This acceptance by parents of risk stratification as a concept, and their current use of a similar  
30 assessment strategy, suggests that increased communication of the level of a child's risk may  
31 support shared decision making between families and healthcare professionals. Furthermore,  
32 explicitly stating the level of risk for a child may quieten the emotional responses that healthcare  
33 professionals have towards reduced therapy regimens.  
34

35 The challenge of deciphering statistical evidence regarding risks was evident, even within the  
36 healthcare professionals groups. In one group, misunderstandings about systematic review  
37 methodology, and confusion over statistical issues, such as power, led to mistrust of the evidence.  
38

39  
40 *"Mod: ... 2660 episodes of data, how much more would people need to be more confident*  
41 *in this number (points to treatment failure rate)?*

42 *[ongoing discussion]*

43 *1: is that international?*

44 *Mod: yes it's international around the world*

45 *2: so if it's all round the world?*

46 *[additional discussion]*

47 *2: so actually you could say it's a small number if it's...*

48 *1: there's the whole world...*

49 *2: yeah couldn't you? and how many within each study? That would be the other thing*

50 *[further discussion]*

51 *1: because if the numbers were high, people would be more convinced that this is real, I*  
52 *think if er... you know I'd see, for instance this is just an example, if you had 500,000*  
53 *episodes and then you saw this, you'd say yeah that's it, this is what we need to go for*  
54  
55  
56  
57

1  
2  
3 *(murmur of agreement from (2)) but two and a half thousand odd is not going to be*  
4 *convincing.” (Centre 2, doctor (1) and nurse (2))*  
5

6 Alongside these statistical misunderstandings, in all healthcare professional groups, there were  
7 moments within the discussion where comments made were inconsistent with other beliefs they  
8 held. In Centre 2, one participant stated *“but if you look at the 0.1% risk [of PICU admission or death*  
9 *in low risk febrile neutropenia], it’s still high, in that group, because your range is between 0.03 to*  
10 *0.3%, and you’ve got 0.1%”*. Considering a 0.1% risk of PICU admission or death to be high seems  
11 unusual: in a field where 3% of children with cancer die of infection and around 15% die of  
12 progressive disease.[1, 16]  
13

14 One method that healthcare professional participants used to help understand the risk statistics and  
15 express the inconsistency of their discussions was to compare the risks in febrile neutropenia to  
16 other clinical situations, both within the context of other haematology and oncology conditions and  
17 within other specialties, particularly general paediatrics.  
18

19 Discussion by professionals about their own decision making revealed and acknowledged tension  
20 between making judgements based on research evidence and individual emotional experience.  
21

22  
23 *“2: I think the interesting thing there for me [Mod] is that you’ve presented us with the*  
24 *evidence (laughter from others) which is by far and away saying that this is a safe thing to*  
25 *do...*

26 *4: we’ve chosen to ignore it...*

27  
28 *2: but we’ve chosen to ignore it... so we’re practicing non-evidence based anecdotal*  
29 *medicine (ongoing laughter) but it’s what we’re comfortable with...*

30 *Mod: ok... so what factors played the role in making that decision...*

31 *2: non evidence based anecdotal...*

32 *4: anxiety...*

33  
34 *(laughter and indiscernible mutterings)” (Centre 1, doctor (2) and nurse (4))*  
35

36 In Centre 3, professionals used fewer anecdotal accounts of patient deteriorations and appeared to  
37 have a less emotional, and more positive, response to early discharge.  
38

39 Professional participants were very clear about the extent of influence that healthcare staff should  
40 have over families’ perceptions of risk. In the following quote, a participant outlines the dilemma of  
41 how to communicate about risk.  
42

43 *“...and then you have to try and put the frighteners on them and you have to gauge that*  
44 *right as to how... because I’ve had people saying oh I... oh I know ... we’ve got four hours to*  
45 *wait... and I say well sometimes children deteriorate more rapidly than that....erm... but it’s*  
46 *really difficult to know quite how... how scary to be with them isn’t it?” (Centre 3, doctor)*  
47

48 Throughout this theme, it is clear that participants struggled with the uncertainty of risk. They  
49 sought the illusion of certainty, aiming to find security in the absolute, irrespective of the reality of  
50 its non-existence. This may be founded in limited understanding or familiarity with statistical  
51 concepts. However, the assessment of risk is not a purely technical act but instead a political and  
52 social construct, with many underlying social, emotional and cultural influences.  
53  
54

55 *Articulating and interpreting protocols*  
56  
57



1  
2  
3 All the documents discussed in this manuscript are entitled guidelines, suggesting flexibility in the  
4 use of their recommendations. However, participants used the word protocol almost exclusively and  
5 appeared to understand and use these documents as formal and rigid policies. We have used their  
6 terminology.  
7

8 Although the direction given by protocols provided reassurance to healthcare professionals,  
9 protocols were interpreted as controlling and limited decisions by implying an inability to deviate  
10 from them, resulting in frustration:  
11

12 *"1: I think the other thing that makes it frustrating its very protocol driven innit?*

13 *(2: (at the same time) yeah)*

14 *1: I think people stick rigidly to 48 hours as though it's a magic number and nobody can go*  
15 *home at 43 hours and etcetera...so I think it's very very rigid err which is done for good*  
16 *reasons but I think if you dare to suggest that you veer from that you're scorned upon..."*

17 *(Centre 1, doctors)*  
18  
19

20 Professionals described risks of working outside the protocol, in particularly relating to receiving  
21 criticism from colleagues, with groups only briefly referring to the safety risks to patients of  
22 deviating from a protocol. Notably, they referred to the risks to patients of other professionals  
23 departing from the protocol but the risks of criticism refer to their own practice.  
24

25 Participants varied in how much flexibility they thought there should be within a protocol. Centre 1  
26 spoke of a strict protocol with minimal deviations and were willing to accept a greater degree of  
27 frustration because of this. Centre 2 gave considerable weight to clinical reviews, with minimal  
28 references to protocols as a guiding feature. Combining these approaches, professionals at centre 3  
29 spoke about the integration of protocol and clinical judgement:  
30  
31

32 *"1: like you've got the protocol there but actually if you know your patient... me and the*  
33 *consultant might make a decision on our patient that isn't what the protocol says but*  
34 *we're happy with that clinical decision" (Centre 3, nurse)*  
35  
36

37 Parents' main concern regarding protocols related to the fact that discharge rarely occurred at the  
38 point where it was theoretically possible in the protocol. Parents distinguished between appropriate  
39 delays due to the child's ill health, and those which they felt were in some way avoidable. They  
40 voiced their frustration about how services, and decision making, were conditional upon the timing  
41 of a child's presentation with low risk febrile neutropenia. The staff working out of hours may not be  
42 as senior or as experienced as those who provide routine services, and as such, parents recognised  
43 that they may make different judgements about the levels of risk involved or may not feel able to  
44 take on the responsibility of discharging a child.  
45

46 Astutely, parents in a number of groups identified that blood culture results were a significant factor  
47 in professionals' decision making in regards to discharge and that most protocols demanded a  
48 negative blood culture result before a child could be evaluated for discharge. Delays in processing  
49 could result in substantial delays in decision-making.  
50

51 *"1: then my frustration comes with the process and blood culturing and that, towards the*  
52 *end of a stay, is what just really really narks me, that we actually spend at least an extra*  
53 *day in because they don't culture the bloods when you get in straight away, so if we were*  
54  
55  
56  
57

1  
2  
3 *admitted on Monday at noon or after, they don't start culturing the bloods until Tuesday*  
4 *at 9am..." (Centre 3, parent of under 13s)*  
5

6 Thus, blood cultures symbolise the potential for parents to 'escape' from hospital . Delays in  
7 obtaining results capture parents' greatest dislike of current services and protocols; unnecessarily  
8 prolonged hospital stays with an apparently well child.  
9

#### 10 *Preferences for care*

11 Participants' past experiences help to inform and find balance between the uncertainty of risks and  
12 the certainty of protocols. The findings outlined within this section all impacted upon how  
13 participants formed their ideas regarding early discharge. Participants discussed many issues similar  
14 to those found in the earlier meta-ethnography.[11] Participants spoke of the tiring nature of  
15 travelling, particularly at night time or during the rush hour. Distance from the hospital played a key  
16 role in whether early discharge regimens would be accepted, with families living close to the treating  
17 hospital more likely to accept outpatient care. Participants in centre 3, barely mentioned travelling,  
18 presumably because they already live close to their treating POSCUs.  
19

20  
21 Parents discussed finances, related to travel, parking, hospital food and lost income. This was vividly  
22 described by some participants, including the loss of a self-run business, repossession of a car and  
23 the receipt of benefits such as free school meals. The unpredictable nature of febrile neutropenia  
24 episodes proved more problematic than scheduled attendances for review or chemotherapy as it did  
25 not allow them to plan other aspects of their lives, chiefly their work.  
26

27  
28 Participants spoke about the psychological impact of admissions on their child who would become  
29 quiet, anxious or angry when their temperatures were checked at home and they anticipated they  
30 might need to travel to hospital. Following discharge, psychological effects would continue for some  
31 time:  
32

33 *"1: we're definitely a more stressed family when he's admitted...definitely... and it takes a*  
34 *long time for the family to get back on track, it's not just he's home and we're all fine, you*  
35 *actually have to completely collapse and rebuild and that takes a couple of days..."(centre*  
36 *3, parents of under 13s)*  
37

38  
39 Parents described split families, where one parent was in hospital with the affected child and the  
40 other at home with their siblings, with occasional 'handovers' of care, which impacted on their  
41 relationships as couples. The parent who took on the role of primary carer during admissions often  
42 had a deeper relationship with the child when they returned home as well, and the other parent  
43 could feel rejected or 'worthless'. They expressed guilt over their choices when faced with the  
44 differing needs of their children.  
45

46 Professionals mostly spoke about the experiences of families, with very few references to their own  
47 perspectives, even when directly asked. They mentioned each of the key issues mentioned above  
48 but provided less detail and did not identify more nuanced issues about the patient experience. This  
49 situation resulted in double silencing of both parents and professional voices.  
50

51 Six newly identified difficulties were discussed by participants in this study. First, all participants  
52 spoke clearly about how these are generally well children who are active, noisy and boisterous on a  
53 ward. They reported boredom and frustration during admissions and were concerned about their  
54 child disturbing other children who were more unwell. Secondly, parents worried about 'hospital  
55 acquired infection' and spoke about the risks of wards or hospitals which were not clean. Third,  
56  
57

1  
2  
3 participants spoke about the impact of 'source isolation' in two ways. First, well-children who are  
4 source isolated are usually even more bored or frustrated. Second, where source isolation beds are  
5 limited, participants knew that these are unavailable to sicker patients when children with low risk  
6 febrile neutropenia are admitted. Parents expressed guilt for using these resources. Staff expanded  
7 on the issue of bed pressure (the fourth new difficulty), describing intense challenges faced by  
8 health services, where numbers of bed spaces are reduced and costs of bed occupancy are high.  
9

10 The fifth challenge, discussed only by parents and young people, related to side effects of  
11 treatments, particularly diarrhoea caused by antibiotics, necessitating source isolation, and might  
12 also cause the child to need intravenous fluids or total parenteral nutrition, delaying their discharge.  
13 Parents voiced a clear preference for reduced amounts of antibiotics, particularly those given  
14 intravenously. In addition, parents spoke about concerns regarding antibiotic resistance and how  
15 this might impact on their child in the future. These issues were not raised in the healthcare  
16 professional discussions.  
17

18  
19 Sixth, healthcare professionals in Centre 3 discussed the long-term psychological impact of current  
20 febrile neutropenic care.  
21

22 *"... as a late effects nurse... the risk of repeated hospitalisations and family seeing their*  
23 *child as sick and continuing to do so after the... and never really recovering from that sick*  
24 *child mentality... I don't know if that's a bit strong... I see the late effect of that when*  
25 *you've still got families who haven't been able to stop treating their child as a sick child*  
26 *right up until the child being in their early adulthood... I don't know how you'd ever*  
27 *measure that to balance it against that 0.1% risk..." (Centre 3, nurse)*  
28  
29

30 Three benefits of inpatient care were described. First, was the idea that hospital is a safe place,  
31 where professionals looked after their child's health, though focused mainly on physical health  
32 Parents stated that hospital was the place they would prefer their child to be if they judged them  
33 unwell. Families felt comforted by the presence of healthcare staff with whom they had good  
34 relationships and by the ritual of performing regular observations, although some groups did  
35 highlight that many observations could be done at home. Second; hospital can be fun. Young people  
36 and their parents enjoyed the input of youth support co-ordinators and activities that are organised  
37 in the hospital. This did not seem to play a major role in decision making and parents were clear that  
38 they would still prefer a reduced therapy strategy. Third is the relational benefits that children and  
39 young people gained from the undivided attention of a parent, who, at home, might be distracted by  
40 other siblings and by the 'hubbub' of daily life.  
41  
42

43 When participants discussed the preferences of other participant groups, they often misunderstood  
44 perceived desires of others. For example, the young people anticipated that their parents would all  
45 rather receive inpatient care. This was at odds to the parents' stated preferences  
46

47 *"1: if my mum agreed with the doctors, then I'd just do what she said, cos they don't like...*  
48 *when I'm saying something its normally cos it's what I'd prefer, when my mum tells me to*  
49 *do something its what's best for me... so... I'd probably whinge about having to staying in*  
50 *hospital but then... I'd just stay anyway.*  
51

52 *2: I don't know... I don't think I'd really... I think my mum would just do what's right for me.*  
53 *Yeah" (Centre 1, Young people)*  
54

## 55 Discussion

56  
57

1  
2  
3 In summary, participants described a *quest for certainty*, in which they attempted to balance the  
4 uncertainty involved in understanding, expressing and negotiating risk with the illusion of certainty  
5 provided by strict protocols. Risks were assessed using both formal and informal stratification tools,  
6 overlaid with the emotional reactions to risk and experiences of risk within other situations.  
7 Professionals in particular demonstrated more emotional responses than might have been  
8 anticipated, which appeared most associated with centre culture rather than age or experience.  
9 Understanding statistical expressions of risk proved challenging for patients, parents and healthcare  
10 professionals. Meanwhile, the benefits of certainty provided by protocols resulted in frustration at  
11 the strict constraints they mandated. The perceived benefits and harms of inpatient care that  
12 participants had previously experienced informed their appraisals of future treatment strategies and  
13 provided them with both more confidence in their risk assessments and a greater desire for  
14 flexibility within protocols.  
15

16  
17 Throughout this study, the differences in focus between families and healthcare professionals  
18 became apparent, particularly concerning health. Professionals had a limited focus on physical  
19 health, almost entirely on the prevention of an intensive care admission or death. Their focus on  
20 individual children was relatively narrow, though they had a broader focus on the number of families  
21 impacted, taking into account the variety within their service population. Parents meanwhile  
22 focused on the broader aspects of child health, including side effects of interventions, social and  
23 emotional impacts and wider family health. However, they mostly concentrated on their individual  
24 child. Though they did discuss how others might differ in their opinions and desires when  
25 considering future services, it was the optimum regimen for their child and family that was put  
26 forward most strongly. These differences in objectives for future care are understandable given the  
27 responsibilities of families and healthcare professionals. However, stakeholders did not always  
28 understand each other's priorities.  
29

30  
31 Linked to this difference in focus on health, participants discussed the most distressing aspects of  
32 being involved with children with febrile neutropenia differently according to their participant  
33 group. Healthcare professionals almost always discussed intensive care admission or death as their  
34 primary adverse experiences. Meanwhile, parents focused more upon their experiences of poor  
35 care, such as delayed identification of positive culture growth, difficult venous access and the failure  
36 of professionals to identify what they perceived to be an unwell child. This highlights the differences  
37 in consideration of health between the two groups, whilst emphasising that many parents have no  
38 experience of death or intensive care admissions related to febrile neutropenia. Thus their  
39 perceptions of risk of these events were somewhat different to those of professionals who often  
40 have experience of high risk febrile neutropenia and thus develop strongly emotive reactions to  
41 suggestions of reductions in therapy. To families who experience more of the burdens of inpatient  
42 febrile neutropenia care, it is the failures to provide care focused on a holistic definition of health  
43 which play a more significant role in their experience.  
44

45  
46 These differences in focus further inform the interpretation of our previous systematic review, and  
47 of healthcare research in general.[9] The review used outcomes, collected by the primary studies,  
48 that reflect the focus of healthcare professionals – intensive care, death and healthcare service  
49 usage, as opposed to those of the families receiving care. We now see that when primary research  
50 is designed by professionals to detect these outcomes, and fails to take into account the experiences  
51 of care that families value, these outcomes are also hidden in secondary research. Future research  
52 design should involve more public and patient involvement in the outcome setting stage, and the  
53 interpretation of quantitative research should involve discussions with patients and families so as to  
54  
55

1  
2  
3 gain more insight into the different viewpoints on specific statistical findings, dependent on prior  
4 experiences and consideration of other benefits and harms.

5  
6 Historically, determinism has shaped healthcare culture.[17] In the deterministic worldview,  
7 predominant in early medicine, the role of physicians was to establish the definitive causes and  
8 treatments for disease. The clinician would strive to control each aspect of a patient's health so as to  
9 have control over their outcomes.[17] Determinism inspires and promotes the creation of certainty,  
10 and thus where this cannot be achieved, the illusion of certainty can be considered a reasonable  
11 replacement as it provides a sense of control and reassurance within difficult situations.  
12 Understanding statistical risks and making decisions based upon them is not prioritised, instead:  
13 *"The goal is certainty, rather than learning how to live with uncertainty".*[17]  
14

15  
16 In contemporary healthcare, there is no certainty. Shared decision making has been suggested as an  
17 appropriate step in overcoming determinism, recognising differences in focus and beginning to  
18 respect the rights of patients to have autonomy over their healthcare decisions. Shared decision  
19 making is most suited to situations in which evidence shows little difference in outcomes between  
20 treatment options, and thus patients' values or preferences might play a more important role in  
21 resolving this equipoise.[18–21] In low risk paediatric febrile neutropenia, evidence suggests that  
22 serious safety events are not affected by the location of care and, as such, individualised judgements  
23 about other risks of readmission and patient preferences become more prominent.[9] Specifically,  
24 within the literature, there has been a drive to use shared decision making *"where the balance of*  
25 *risks and benefits varies widely in different medical, social and health care situations"*. [18] Given the  
26 findings reported here, it might be considered that patients' social circumstances, along with the  
27 individual psychological impact of admission, might lead to a different balance of risks and benefits  
28 for each family affected by paediatric low risk febrile neutropenia.  
29

30  
31 Practically, one approach which may be particularly useful in stimulating shared decision making  
32 conversations is to routinely risk stratify all patients and communicate this risk to families, following  
33 education regarding the differences in risk groups and in the management of febrile neutropenia.  
34 This will be further facilitated by ongoing work by the PICNICC (Predicting Infectious Complications  
35 of Neutropenic sepsis In Children with Cancer) collaboration into the development of clear and  
36 robust risk stratification rules, so that there is universal agreement on the definition of children at  
37 low risk of septic complications.  
38

### 39 *Strengths and weaknesses*

40  
41 This study involves new voices in the discussion of febrile neutropenia management, particularly  
42 healthcare professionals and deepened consideration of the disease-specific factors which influence  
43 stakeholders' experiences and inform their decisions about future care. The inclusion of multiple  
44 centres allows for an understanding of the impact of service design and centre culture upon  
45 participants' perceptions.  
46

47  
48 The majority of the challenges relate to recruitment difficulties, particularly of young people and  
49 those who have a limited ability to communicate in English. This reflects broader problems within  
50 the research community of engaging with participants from social disadvantaged groups and those  
51 from multi-cultural contexts.[22, 23] Introducing Amazon vouchers to compensate participants for  
52 their time resulted in improvements in recruitment of young people and thus have helped to reduce  
53 the shortcomings. Future studies may wish to integrate other methodologies, including interviews or  
54 online focus groups for those who do not wish to participate in face-to-face groups, as well as  
55  
56  
57

options to participate using different languages for those who are unable to confidently take part in English language focus groups.

The small size of some of the focus groups may be considered a limitation by some as they may lead to less extensive discussions and shy or dominating participants may have a more acute effect on the group. However, smaller groups have been purported to be beneficial in discussions involving complex subjects, or in groups of experts, such as healthcare professionals, and thus we feel are not a substantial disadvantage in this setting.[22, 24, 25]

## Conclusions

This study highlights the previously underestimated harms of admission for febrile neutropenia and the paternalistic nature of decision making, along with the frustrations and challenges for all parties involved in febrile neutropenia care. It justifies a reassessment of current treatment strategies for these children and further exploration of the potential to introduce shared decision making.

## References

1. Basu SK, Fernandez ID, Fisher SG, et al (2005) Length of Stay and Mortality Associated With Febrile Neutropenia Among Children With Cancer. *J Clin Oncol* 23:7958–7966 . doi: 10.1200/JCO.2005.01.6378
2. Chisholm JC, Dommett R (2006) The evolution towards ambulatory and day-case management of febrile neutropenia. *Br J Haematol* 135:3–16 . doi: 10.1111/j.1365-2141.2006.06253.x
3. Phillips RS, Lehrnbecher T, Alexander S, Sung L (2012) Updated systematic review and meta-analysis of the performance of risk prediction rules in children and young people with febrile neutropenia. *PLoS One* 7:e38300 . doi: 10.1371/journal.pone.0038300
4. Johnson E, Phillips RS, Chisholm J, et al (2015) CCLG National Febrile Neutropenia Audit Report 2015
5. Ammann RA, Bodmer N, Hirt A, et al (2010) Predicting Adverse Events in Children With Fever and Chemotherapy-Induced Neutropenia: The Prospective Multicenter SPOG 2003 FN Study. *J Clin Oncol* 28:2008–2014 . doi: 10.1200/JCO.2009.25.8988
6. Sung L, Aplenc R, Alonzo TA, et al (2013) Effectiveness of supportive care measures to reduce infections in pediatric AML: a report from the Children's Oncology Group. *Blood* 121:3573–3577 . doi: 10.1182/blood-2013-01-476614
7. Mustafa MM, Aquino VM, Pappo A, et al (1996) A pilot study of outpatient management of febrile neutropenic children with cancer at low risk of bacteremia. *J Pediatr* 128:847–9
8. Teuffel O, Amir E, Alibhai SMH, et al (2011) Cost-effectiveness of outpatient management for febrile neutropenia in children with cancer. *Pediatrics* 127:e279-286 . doi: 10.1542/peds.2010-0734
9. Morgan JE, Cleminson J, Atkin K, et al (2016) Systematic review of reduced therapy regimens for children with low risk febrile neutropenia. *Support Care Cancer Off J Multinatl Assoc Support Care Cancer*. doi: 10.1007/s00520-016-3074-9

10. Sung L, Feldman BM, Schwamborn G, et al (2004) Inpatient versus outpatient management of low-risk paediatric febrile neutropenia: measuring parents' and healthcare professionals' preferences. *J Clin Oncol Off J Am Soc Clin Oncol* 22:3922–3929 . doi: 10.1200/JCO.2004.01.077
11. Morgan J, Cleminson J, Atkin K Qualitative synthesis of experiences of early discharge, with a focus on paediatric febrile neutropenia. *Submiss*
12. Bate J, Gibson F, Selwood K, et al (2013) A reaudit of current febrile neutropenia practice in UK paediatric oncology centres prior to implementation of NICE guidance. *Arch Dis Child* 98:315–316 . doi: 10.1136/archdischild-2013-303810
13. NICE CG151 Neutropenic sepsis: full guideline. In: NICE. <http://www.nice.org.uk/>. Accessed 25 Sep 2013
14. Dommett R, Geary J, Freeman S, et al (2009) Successful introduction and audit of a step-down oral antibiotic strategy for low risk paediatric febrile neutropaenia in a UK, multicentre, shared care setting. *Eur J Cancer* 45:2843–9 . doi: 10.1016/j.ejca.2009.06.003
15. Mental Health Research Network and INVOLVE (2013) Budgeting for Involvement: Practical advice for budgeting for actively involving the public in research studies
16. National Cancer Intelligence Network (2012) National Registry of Childhood Tumours Progress Report. NRCT, Oxford, UK
17. Gigerenzer G, Gaissmaier W, Kurz-Mileke E, et al (2008) Helping Doctors and Patients Make Sense of Health Statistics. *Psychol Sci Public Interest* 8:53–96
18. Ferrer RL, Gill JM (2013) Shared Decision Making, Contextualized. *Ann Fam Med* 11:303–305 . doi: 10.1370/afm.1551
19. Berger Z (2015) Navigating the Unknown: Shared Decision-Making in the Face of Uncertainty. *J Gen Intern Med* 30:675–678 . doi: 10.1007/s11606-014-3074-8
20. Pollard S, Bansback N, Bryan S (2015) Physician attitudes toward shared decision making: A systematic review. *Patient Educ Couns* 98:1046–1057 . doi: 10.1016/j.pec.2015.05.004
21. Elwyn G (2006) Idealistic, impractical, impossible? Shared decision making in the real world. *Br J Gen Pract* 56:403–404
22. Bloor M, Frankland J, Thomas M, Robson K (2001) Focus groups in Social Research
23. Barbour R (2007) *Doing Focus Groups*. SAGE Publications, Ltd, London
24. Morgan DL (1997) *Focus Groups as Qualitative Research*, 2nd ed. Sage Publications, Inc, London
25. Barbour RS, Kitzinger J (1999) *Developing Focus Group Research: Politics, Theory and Practice*. SAGE Publications, Ltd, London

## Focus group topic guides

### **Summary Topic Guide for Focus Group Discussions with young people and parent participants**

All focus groups will begin with a reminder of the aims of the study, verbal confirmation of consent, the restating of the right to withdraw from the study up to two weeks following the focus group discussion and the opportunity for participants to ask any outstanding questions.

#### Introductory questions

1. What do you understand about febrile neutropenia?
  - Do you know anything about how to decide if someone has low risk or high risk febrile neutropenia?
2. Have you ever had an episode of febrile neutropenia? Can you tell me about it/them?
  - What is the treatment like in your hospital?
  - What were the best things about the episode of treatment? What were the worst? Why?

Explanation of current research and different possible treatment strategies.

3. What do you think about these different options? If they were all offered at your hospital, which would you pick and why?

It would be good to talk more about outpatient treatment of febrile neutropenia.

4. Tell me more about what you think of this option. Would you want it for you/your child?
5. Can you tell me a bit about how you decided if you would or wouldn't? What factors played a part in your decision making? How important was each factor?
  - If not mentioned, ask about: practical issues (eg transport, distance from hospital, finances, care of other children), emotional/social issues (eg. wanting to be together as a family, fear of going home, feeling of not being able to cope at home), trust in health care professionals
6. How would what your family/child feel influence your decision? What do you think they would say about outpatient care? If disagreements occurred, how should these be negotiated?
7. How would what your doctor/nurse feel influence your decision? What do you think they would say about outpatient care? If disagreements occurred, how should these be negotiated?

Introduce evidence about failure to consent rates.

8. Why do you think this might be?
9. Do you want to say more about the questions we just discussed in the light of this research?

Service design

10. How do you think an outpatient febrile neutropenia service could be designed to make you most happy with it?



- If not mentioned discuss: when go home, route of antibiotics, how followed up (home/clinic), what symptoms would be tolerated at home (eg repeated fever)

Any other issues/questions/comments?

**All medical queries raised by the participants during the focus group discussions will be redirected to their clinical care team. Debriefing will be offered to participants immediately after the focus group discussions and a telephone number will also be provided in case they wish to discuss any further issues with the research.**

For peer review only

### **Summary Topic Guide for Focus Group Discussions with health care professionals**

All focus groups will begin with a reminder of the aims of the study, verbal confirmation of consent, the restating of the right to withdraw from the study up to two weeks following the focus group discussion and the opportunity for participants to ask any outstanding questions. Participants in the focus groups for healthcare professionals will be reminded that the research team are only interested in their general views and will not be discussing the details of individual cases.

#### Introductory questions

1. What is your role in looking after children with low risk febrile neutropenia?
2. Tell me about the treatment of low risk febrile neutropenia in your hospital?
3. What sort of issues develop when caring for patients with low risk febrile neutropenia?

Explanation of current research and different possible treatment strategies.

4. What do you think about these different options? Which one(s) do you think it is appropriate to offer to your patients?

It would be good to talk more about outpatient treatment of febrile neutropenia.

5. Tell me more about what you think of this option. Would you want it for your patients?
6. Can you tell me a bit about how you decided if you would or wouldn't? What factors played a part in your decision making? How important was each factor?
  - If not mentioned, ask about: practical issues (eg transport, distance from hospital, finances, care of other children), emotional/social issues (eg. wanting to be together as a family, fear of going home, feeling of not being able to cope at home), trust in health care professionals
7. How would what the family/child feel influence your decision? What do you think they would say about outpatient care? If disagreements occurred, how should these be negotiated?

Introduce evidence about failure to consent rates.

8. Why do you think this might be?
9. Do you want to say more about the questions we just discussed in the light of this research?

Service design

10. How do you think an outpatient febrile neutropenia service could be designed to make you most happy with it?
  - If not mentioned discuss: when go home, route of antibiotics, how followed up (home/clinic), what symptoms would be tolerated at home (eg repeated fever)
11. How does the design of the healthcare service as a whole influence how services could be delivered?
12. Who makes decisions about these kinds of changes? What do you think they would think/say?

Any other issues/questions/comments?

1  
2  
3 **Debriefing will be offered to participants immediately after the focus group discussions and a**  
4 **telephone number will also be provided in case they wish to discuss any further issues with the**  
5 **research.**  
6  
7  
8  
9  
10  
11  
12  
13  
14  
15  
16  
17  
18  
19  
20  
21  
22  
23  
24  
25  
26  
27  
28  
29  
30  
31  
32  
33  
34  
35  
36  
37  
38  
39  
40  
41  
42  
43  
44  
45  
46  
47  
48  
49  
50  
51  
52  
53  
54  
55  
56  
57  
58  
59  
60

For peer review only

## COREQ checklist

(Taken from: Tong et al. Consolidated criteria for reporting qualitative research (COREQ): a 32-item checklist for interviews and focus groups. International Journal for Quality in Health Care, Volume 19, Issue 6, 1 December 2007, Pages 349–357, <https://doi.org/10.1093/intqhc/mzm042>)

| No.                                            | Item                                     | Guide questions/description                                                                                                                              | Response                                                                                                                                                                    |
|------------------------------------------------|------------------------------------------|----------------------------------------------------------------------------------------------------------------------------------------------------------|-----------------------------------------------------------------------------------------------------------------------------------------------------------------------------|
| <b>Domain 1: Research team and reflexivity</b> |                                          |                                                                                                                                                          |                                                                                                                                                                             |
| Personal Characteristics                       |                                          |                                                                                                                                                          |                                                                                                                                                                             |
| 1                                              | Interviewer/facilitator                  | Which author/s conducted the interview or focus group?                                                                                                   | See page 5                                                                                                                                                                  |
| 2                                              | Credentials                              | What were the researcher's credentials? E.g. PhD, MD                                                                                                     | See page 5                                                                                                                                                                  |
| 3                                              | Occupation                               | What was their occupation at the time of the study?                                                                                                      | See page 5                                                                                                                                                                  |
| 4                                              | Gender                                   | Was the researcher male or female?                                                                                                                       | See page 5                                                                                                                                                                  |
| 5                                              | Experience and training                  | What experience or training did the researcher have?                                                                                                     | See page 5                                                                                                                                                                  |
| Relationship with participants                 |                                          |                                                                                                                                                          |                                                                                                                                                                             |
| 6                                              | Relationship established                 | Was a relationship established prior to study commencement?                                                                                              | See page 5                                                                                                                                                                  |
| 7                                              | Participant knowledge of the interviewer | What did the participants know about the researcher? e.g. personal goals, reasons for doing the research                                                 | See page 5                                                                                                                                                                  |
| 8                                              | Interviewer characteristics              | What characteristics were reported about the interviewer/facilitator? e.g. Bias, assumptions, reasons and interests in the research topic                | See page 5.                                                                                                                                                                 |
| <b>Domain 2: study design</b>                  |                                          |                                                                                                                                                          |                                                                                                                                                                             |
| Theoretical framework                          |                                          |                                                                                                                                                          |                                                                                                                                                                             |
| 9                                              | Methodological orientation and theory    | What methodological orientation was stated to underpin the study? e.g. grounded theory, discourse analysis, ethnography, phenomenology, content analysis | Thematic content analysis as outlined by Creswell, John (2007). Qualitative Inquiry & Research Design: Choosing Among Five Approaches. Thousand Oaks, CA: Sage Publications |
| Participant selection                          |                                          |                                                                                                                                                          |                                                                                                                                                                             |
| 10                                             | Sampling                                 | How were participants selected? e.g. purposive, convenience, consecutive, snowball                                                                       | See pages 4 & 5                                                                                                                                                             |

|                 |                                  |                                                                                         |                                                                                                                                                                                                                                                                                                                                                 |
|-----------------|----------------------------------|-----------------------------------------------------------------------------------------|-------------------------------------------------------------------------------------------------------------------------------------------------------------------------------------------------------------------------------------------------------------------------------------------------------------------------------------------------|
| 11              | Method of approach               | How were participants approached?<br>e.g. face-to-face, telephone, mail,<br>email       | See page 5                                                                                                                                                                                                                                                                                                                                      |
| 12              | Sample size                      | How many participants were in the<br>study?                                             | See page 6                                                                                                                                                                                                                                                                                                                                      |
| 13              | Non-participation                | How many people refused to<br>participate or dropped out?<br>Reasons?                   | This data was not<br>formally<br>collected.                                                                                                                                                                                                                                                                                                     |
| Setting         |                                  |                                                                                         |                                                                                                                                                                                                                                                                                                                                                 |
| 14              | Setting of data<br>collection    | Where was the data collected? e.g.<br>home, clinic, workplace                           | See page 5                                                                                                                                                                                                                                                                                                                                      |
| 15              | Presence of non-<br>participants | Was anyone else present besides<br>the participants and researchers?                    | See page 5                                                                                                                                                                                                                                                                                                                                      |
| 16              | Description of<br>sample         | What are the important<br>characteristics of the sample? e.g.<br>demographic data, date | See page 6 and<br>table 2.                                                                                                                                                                                                                                                                                                                      |
| Data collection |                                  |                                                                                         |                                                                                                                                                                                                                                                                                                                                                 |
| 17              | Interview guide                  | Were questions, prompts, guides<br>provided by the authors? Was it pilot<br>tested?     | See page 5 and<br>supplementary<br>resource 1                                                                                                                                                                                                                                                                                                   |
| 18              | Repeat interviews                | Were repeat interviews carried out?<br>If yes, how many?                                | No repeat focus<br>groups/interviews<br>were performed.                                                                                                                                                                                                                                                                                         |
| 19              | Audio/visual<br>recording        | Did the research use audio or visual<br>recording to collect the data?                  | See page 5                                                                                                                                                                                                                                                                                                                                      |
| 20              | Field notes                      | Were field notes made during and/or<br>after the interview or focus group?              | See page 5                                                                                                                                                                                                                                                                                                                                      |
| 21              | Duration                         | What was the duration of the<br>interviews or focus group?                              | See page 5                                                                                                                                                                                                                                                                                                                                      |
| 22              | Data saturation                  | Was data saturation discussed?                                                          | No – saturation is<br>a contested<br>concept in<br>qualitative<br>research.<br>However,<br>repeated<br>sampling of<br>different<br>demographics is<br>discussed within<br>the sampling plan<br>on page 5. Our<br>approach,<br>therefore, was<br>more consistent<br>with gaining<br>maximum<br>variation, which<br>reflected the<br>diversity of |

|                                        |                              |                                                                                                                                   |                                                      |
|----------------------------------------|------------------------------|-----------------------------------------------------------------------------------------------------------------------------------|------------------------------------------------------|
|                                        |                              |                                                                                                                                   | experiences.                                         |
| 23                                     | Transcripts returned         | Were transcripts returned to participants for comment and/or correction?                                                          | No.                                                  |
| <b>Domain 3: analysis and findings</b> |                              |                                                                                                                                   |                                                      |
| Data analysis                          |                              |                                                                                                                                   |                                                      |
| 24                                     | Number of data coders        | How many data coders coded the data?                                                                                              | See page 5                                           |
| 25                                     | Description of coding tree   | Did authors provide a description of the coding tree?                                                                             | See pages 5&6                                        |
| 26                                     | Derivation of themes         | Were themes identified in advance or derived from the data?                                                                       | See page 6                                           |
| 27                                     | Software                     | What software, if applicable, was used to manage the data?                                                                        | See page 5                                           |
| 28                                     | Participant checking         | Did participants provide feedback on the findings?                                                                                | See page 6                                           |
| Reporting                              |                              |                                                                                                                                   |                                                      |
| 29                                     | Quotations presented         | Were participant quotations presented to illustrate the themes / findings? Was each quotation identified? e.g. participant number | Yes, see throughout                                  |
| 30                                     | Data and findings consistent | Was there consistency between the data presented and the findings?                                                                | Yes – see throughout                                 |
| 31                                     | Clarity of major themes      | Were major themes clearly presented in the findings?                                                                              | Yes. See results section and its subheadings.        |
| 32                                     | Clarity of minor themes      | Is there a description of diverse cases or discussion of minor themes?                                                            | Yes – minor themes discussed throughout the results. |
